# Supplementary material for: XIST lncRNA Knockdown Potentiates Dinaciclib-Induced Apoptosis in Acute myeloid leukemia via Bcl-2/NF-κB Axis Suppression
Source: Research Square preprint supplement (doi:10.21203/rs.3.rs-7393813/v1), 2025-10-06
Supplement: Supplementary file 1 [file 1616d1497bf7a8b59bfa656f.docx]

Supplementary Table S2

| Table S2. PRIMER SEQUENCES | | |
| --- | --- | --- |
| XIST | Forward | 5'- AGC AGG TCA GGC AGA GGA AGT C -3' |
| Reverse | 5'- CCC GAT ACA ACA ATC ACG CAA AGC -3' |
| BCL-2 | Forward | 5'- TCG CCC TGT GGA TGA CTG A -3' |
| Reverse | 5'- CAG AGA CAG CCA GGA GAA ATC A -3' |
| NF-B | Forward | 5'- CAT ATT TGG GAA GGC CTG AAC A -3' |
| Reverse | 5'- CCC ACA TAG TTG CAG ATT TTG AC -3' |
| CDK1 | Forward | 5'- CCT AGC ATC CCA TGT CAA AAA CTT GG -3' |
| Reverse | 5'- TGA TTC AGT GCC ATT TTG CCA GA -3' |
| CDK2 | Forward | 5'- GGC ATT CCT CTT CCC CTC ATC AA -3' |
| Reverse | 5'- CTC CAA AAG CTC TGG CTA GTC CA -3' |
| CDK5 | Forward | 5'- ATT AGC AGG TTC TGG GGC TT -3' |
| Reverse | 5'- AAT GGT GAC CTC GAT CCT GA -3' |
| CDK9 | Forward | 5'- CAT TAC AGC CTT GCG GGA GA -3' |
| Reverse | 5'- ACC CTT GCA GCG GTT ATA GG -3' |
| β-ACTIN | Forward | 5'- CAC CAT TGG CAA TGA GCG GTT C 3' |
| Reverse | 5'- AGG TCT TTG CGG ATG TCC ACG T -3' |
