# Supplementary material for: XIST lncRNA Knockdown Potentiates Dinaciclib-Induced Apoptosis in Acute myeloid leukemia via Bcl-2/NF-κB Axis Suppression
Source: Research Square preprint supplement (doi:10.21203/rs.3.rs-7393813/v1), 2025-10-06
Supplement: Supplementary file 2 [file 86793250b80ea6cb01169097.docx]

| Case No. | AML  #1 | AML  #2 | AML  #3 | AML  #4 | AML  #5 | AML  #6 | AML  #7 | AML  #8 | AML  #9 | AML  #10 | AML  #11 | AML  #12 |
| --- | --- | --- | --- | --- | --- | --- | --- | --- | --- | --- | --- | --- |
| Sample type | PB/BM | PB/BM | PB/BM | PB/BM | PB/BM | PB/BM | PB/BM | PB/BM | PB/BM | PB/BM | PB/BM | PB/BM |
| FAB subtype | M2 | M4 | M5 | M3 | M2 | M5 | M2 | M5 | M4 | M3 | M2 | M3 |
| age | 71 | 53 | 58 | 58 | 58 | 64 | 44 | 49 | 69 | 50 | 75 | 75 |
| sex | M | F | F | F | M | M | M | F | M | F | M | M |
| WBC | 160  H | 86.24  H | 57.65  H | 23.27  H | 4.55 | 0.13  L | 5.51 | 57.65  H | 72.99  H | 1.86  L | 170  H | 2.64  L |
| RBC | 2.57  L | 2.07  L | 3.41  L | 2.52  L | 3.62  L | 2.42  L | 0.75  L | 1.34  L | 1.59  L | 1.06  L | 2.26  L | 1.14  L |
| plt | 57  L | 36  L | 192 | 12  L | 60  L | 8  L | 36  L | 36  L | 41  L | 7  L | 101  L | 11  L |
| Hb (g/dl) | 7.5  L | 6.4  L | 9.3  L | 7.1  L | 10.3  L | 7.7  L | 2.6  L | 3.7  L | 5.4  L | 3.4  L | 6.2  L | 3.9  L |
| HCT | 22.3%  L | 21.1%  L | 23.7%  L | 22.1%  L | 31.9%  L | 22.4%  L | 7.5%  L | 12.5%  L | 16%  L | 9.5%  L | 20.5%  L | 10.4%  L |
| MCV (fL) | 86.9 | 101.7  H | 69.4  L | 87.8 | 88.1 | 92.7 | 100.3  H | 93.7 | 100.4  H | 89.4 | 90.6 | 90.6 |
| MCH (pg) | 29.3 | 31.1 | 27.3 | 28.2 | 28.4 | 32.1  H | 34.8  H | 27.4 | 33.8  H | 32.4  H | 27.2 | 34  H |
| MCHC (g/dL) | 33.8 | 30.6  L | 39.3  H | 32.1 | 32.2 | 34.6 | 34.7 | 29.2  L | 33.7 | 36.2  H | 30  L | 37.5  H |
| RDW | 25.2%  H | 19.5%  H | 30.3  H | 18.7  H | 19.3%  L | 79.3% | 16.2%  H | 16.9%  H | 20.1%  H | 20.9%  H | 23.3%  H | 17.2%  H |
| NEUT | 21.1%  L | 50.2% | 65.7% | 77.9%  H | 14.3%  L | 0.9%  L | 47.9% | 32.6%  L | 42% | 35.2%  L | 52.4% | 65.8% |
| LYMPH | 44.2% | 9.3%  L | 4.7%  L | 14.2%  L | 37.5% | 0.34%  L | 26% | 16.1%  L | 37.3% | 47% | 8.4%  L | 21.9% |
| MONO | 27.9%  H | 37.1%  H | 13.1%  H | 5.5% | 17.2%  H | 1.1%  L | 16.8%  H | 30.9%  H | 14.8%  H | 12.3%  H | 11.2%  H | 2.3%  L |
| EOS | 0.7% | 1.3% | 0.3% | 0.4% | 0.7% | 0 | 0.3% | 1.8% | 0.2% | 0.2% | 1% | 5%  H |
| CD2 | - | 14% | 22% | - | - | - | 15% | - | - | - | - | - |
| CD13 | 88% | 93% | 92% | - | 99% | 59% | 46% | 39% | 44% | 72% | 73% | 38% |
| CD14 | 4% | 22% | 38% | - | - | 56% | 10% | 28% | 10% | - | - | - |
| CD15 | - | - | 53% | - | 71% | 69% | - | 33% | 54% | - | - | - |
| CD33 | 61% | 52% | 82% | 92% | 96% | 97% | 64% | 93% | 55% | 13% | 90% | 91% |
| CD11b | 8% | 25% | 92% | - | 45% | 91% | 12% | 70% | 22% | - | - | - |
| HLA-DR | 85% | 59% | 38% | - | 41% | 89% | 61% | 64% | 21% | - | 34% | - |
| CD34 | 88% | 77% | 2% | - | - | - | 20% | 6% | 23% | 13% | 15% | - |
| CD38 | 20% | 95% | 87% | 85% | 99% | neg | 73% | 85% | 64% | 28% | 75% | 69% |
| CD45 | 99% | 99% | 99% | 98% | 97% | 99% | 90% | 95% | 56% | 94% | 83% | 83% |
| CD64 | - | 49% | 95% | 62% | 76% | 97% | 31% | 92% | 53% | 68% | 67% | 81% |
| CD117 | 87% | 67% | - | 77% | 80% | - | 48% | 8% | 28% | 41% | 85% | 83% |

**Abbreviations:** AML → Acute Myeloblastic Leukemia; PB → Peripheral Blood; Bone Marrow → BM; WBC → White Blood Cell; RBC → Red Blood Cell; PLT → Platelet; Hb → Hemoglobin; RDW → Red blood cell Distribution Width; EOS → eosinophil
