# Supplementary material for: XIST lncRNA Knockdown Potentiates Dinaciclib-Induced Apoptosis in Acute myeloid leukemia via Bcl-2/NF-κB Axis Suppression
Source: Research Square preprint supplement (doi:10.21203/rs.3.rs-7393813/v1), 2025-10-06
Supplement: Supplementary file 3 [file e3643b765b4d91c842dab84a.xlsx]

## Sheet: XIST miRNAs
ID	Accession	Target	TargetID	Experiment	Literature	Tissue						hsa-let-7a-5p
hsa-let-7a-5p	MIMAT0000062	XIST	7503	CLIP-Seq	24297251	Bone marrow						hsa-let-7b-5p
hsa-let-7a-5p	MIMAT0000062	XIST	7503	CLIP-Seq	24297251	Bone marrow						hsa-let-7c-5p
hsa-let-7a-5p	MIMAT0000062	XIST	7503	CLIP-Seq	24297251	Bone marrow						hsa-let-7d-5p
hsa-let-7a-5p	MIMAT0000062	XIST	7503	CLIP-Seq	24297251	Bone marrow						hsa-let-7e-5p
hsa-let-7b-5p	MIMAT0000063	XIST	7503	CLIP-Seq	24297251	Bone marrow						hsa-let-7f-5p
hsa-let-7b-5p	MIMAT0000063	XIST	7503	CLIP-Seq	24297251	Bone marrow						hsa-let-7g-5p
hsa-let-7b-5p	MIMAT0000063	XIST	7503	CLIP-Seq	24297251	Bone marrow						hsa-let-7i-5p
hsa-let-7b-5p	MIMAT0000063	XIST	7503	CLIP-Seq	24297251	Bone marrow						hsa-miR-101-3p
hsa-let-7c-5p	MIMAT0000064	XIST	7503	CLIP-Seq	24297251	Bone marrow						hsa-miR-103a-3p
hsa-let-7c-5p	MIMAT0000064	XIST	7503	CLIP-Seq	24297251	Bone marrow						hsa-miR-106a-5p
hsa-let-7c-5p	MIMAT0000064	XIST	7503	CLIP-Seq	24297251	Bone marrow						hsa-miR-106b-5p
hsa-let-7c-5p	MIMAT0000064	XIST	7503	CLIP-Seq	24297251	Bone marrow						hsa-miR-107
hsa-let-7d-5p	MIMAT0000065	XIST	7503	CLIP-Seq	24297251	Bone marrow						hsa-miR-10a-5p
hsa-let-7d-5p	MIMAT0000065	XIST	7503	CLIP-Seq	24297251	Bone marrow						hsa-miR-10b-5p
hsa-let-7d-5p	MIMAT0000065	XIST	7503	CLIP-Seq	24297251	Bone marrow						hsa-miR-1224-5p
hsa-let-7d-5p	MIMAT0000065	XIST	7503	CLIP-Seq	24297251	Bone marrow						hsa-miR-1249-3p
hsa-let-7e-5p	MIMAT0000066	XIST	7503	CLIP-Seq	24297251	Bone marrow						hsa-miR-125a-5p
hsa-let-7e-5p	MIMAT0000066	XIST	7503	CLIP-Seq	24297251	Bone marrow						hsa-miR-125b-5p
hsa-let-7e-5p	MIMAT0000066	XIST	7503	CLIP-Seq	24297251	Bone marrow						hsa-miR-126-3p
hsa-let-7e-5p	MIMAT0000066	XIST	7503	CLIP-Seq	24297251	Bone marrow						hsa-miR-1269a
hsa-let-7f-5p	MIMAT0000067	XIST	7503	CLIP-Seq	24297251	Bone marrow						hsa-miR-129-1-3p
hsa-let-7f-5p	MIMAT0000067	XIST	7503	CLIP-Seq	24297251	Bone marrow						hsa-miR-129-2-3p
hsa-let-7f-5p	MIMAT0000067	XIST	7503	CLIP-Seq	24297251	Bone marrow						hsa-miR-129-5p
hsa-let-7f-5p	MIMAT0000067	XIST	7503	CLIP-Seq	24297251	Bone marrow						hsa-miR-1295a
hsa-let-7g-5p	MIMAT0000414	XIST	7503	CLIP-Seq	24297251	Bone marrow						hsa-miR-130a-3p
hsa-let-7g-5p	MIMAT0000414	XIST	7503	CLIP-Seq	24297251	Bone marrow						hsa-miR-130a-5p
hsa-let-7g-5p	MIMAT0000414	XIST	7503	CLIP-Seq	24297251	Bone marrow						hsa-miR-130b-3p
hsa-let-7g-5p	MIMAT0000414	XIST	7503	CLIP-Seq	24297251	Bone marrow						hsa-miR-132-3p
hsa-let-7i-5p	MIMAT0000415	XIST	7503	CLIP-Seq	24297251	Bone marrow						hsa-miR-136-5p
hsa-let-7i-5p	MIMAT0000415	XIST	7503	CLIP-Seq	24297251	Bone marrow						hsa-miR-137
hsa-let-7i-5p	MIMAT0000415	XIST	7503	CLIP-Seq	24297251	Bone marrow						hsa-miR-139-5p
hsa-let-7i-5p	MIMAT0000415	XIST	7503	CLIP-Seq	24297251	Bone marrow						hsa-miR-140-3p
hsa-miR-101-3p	MIMAT0000099	XIST	7503	CLIP-Seq	24297251	Bone marrow						hsa-miR-140-5p
hsa-miR-101-3p	MIMAT0000099	XIST	7503	CLIP-Seq	24297251	Bone marrow						hsa-miR-141-3p
hsa-miR-101-3p	MIMAT0000099	XIST	7503	CLIP-Seq	24297251	Bone marrow						hsa-miR-142-5p
hsa-miR-101-3p	MIMAT0000099	XIST	7503	CLIP-Seq	24297251	Bone marrow						hsa-miR-144-3p
hsa-miR-103a-3p	MIMAT0000101	XIST	7503	CLIP-Seq	24297251	Bone marrow						hsa-miR-144-5p
hsa-miR-106a-5p	MIMAT0000103	XIST	7503	CLIP-Seq	24297251	Bone marrow						hsa-miR-146a-5p
hsa-miR-106a-5p	MIMAT0000103	XIST	7503	CLIP-Seq	24297251	Bone marrow						hsa-miR-146b-5p
hsa-miR-106a-5p	MIMAT0000103	XIST	7503	CLIP-Seq	24297251	Bone marrow						hsa-miR-148a-3p
hsa-miR-106a-5p	MIMAT0000103	XIST	7503	CLIP-Seq	24297251	Bone marrow						hsa-miR-148b-3p
hsa-miR-106b-5p	MIMAT0000680	XIST	7503	CLIP-Seq	24297251	Bone marrow						hsa-miR-149-5p
hsa-miR-106b-5p	MIMAT0000680	XIST	7503	CLIP-Seq	24297251	Bone marrow						hsa-miR-150-5p
hsa-miR-106b-5p	MIMAT0000680	XIST	7503	CLIP-Seq	24297251	Bone marrow						hsa-miR-151a-5p
hsa-miR-106b-5p	MIMAT0000680	XIST	7503	CLIP-Seq	24297251	Bone marrow						hsa-miR-152-3p
hsa-miR-107	MIMAT0000104	XIST	7503	CLIP-Seq	24297251	Bone marrow						hsa-miR-153-3p
hsa-miR-10a-5p	MIMAT0000253	XIST	7503	CLIP-Seq	24297251	Bone marrow						hsa-miR-154-3p
hsa-miR-10a-5p	MIMAT0000253	XIST	7503	CLIP-Seq	24297251	Bone marrow						hsa-miR-154-5p
hsa-miR-10b-5p	MIMAT0000254	XIST	7503	CLIP-Seq	24297251	Bone marrow						hsa-miR-155-5p
hsa-miR-10b-5p	MIMAT0000254	XIST	7503	CLIP-Seq	24297251	Bone marrow						hsa-miR-15a-5p
hsa-miR-1224-5p	MIMAT0005458	XIST	7503	CLIP-Seq	24297251	Bone marrow						hsa-miR-15b-5p
hsa-miR-1249-3p	MIMAT0005901	XIST	7503	CLIP-Seq	24297251	Bone marrow						hsa-miR-16-5p
hsa-miR-125a-5p	MIMAT0000443	XIST	7503	CLIP-Seq	24297251	Bone marrow						hsa-miR-17-5p
hsa-miR-125a-5p	MIMAT0000443	XIST	7503	CLIP-Seq	24297251	Bone marrow						hsa-miR-181a-5p
hsa-miR-125b-5p	MIMAT0000423	XIST	7503	CLIP-Seq	24297251	Bone marrow						hsa-miR-181b-5p
hsa-miR-125b-5p	MIMAT0000423	XIST	7503	CLIP-Seq	24297251	Bone marrow						hsa-miR-181c-5p
hsa-miR-126-3p	MIMAT0000445	XIST	7503	CLIP-Seq	24297251	Bone marrow						hsa-miR-181d-5p
hsa-miR-1269a	MIMAT0005923	XIST	7503	CLIP-Seq	24297251	Bone marrow						hsa-miR-182-5p
hsa-miR-129-1-3p	MIMAT0004548	XIST	7503	CLIP-Seq	24297251	Bone marrow						hsa-miR-185-5p
hsa-miR-129-1-3p	MIMAT0004548	XIST	7503	CLIP-Seq	24297251	Bone marrow						hsa-miR-186-5p
hsa-miR-129-2-3p	MIMAT0004605	XIST	7503	CLIP-Seq	24297251	Bone marrow						hsa-miR-188-5p
hsa-miR-129-2-3p	MIMAT0004605	XIST	7503	CLIP-Seq	24297251	Bone marrow						hsa-miR-18a-5p
hsa-miR-129-5p	MIMAT0000242	XIST	7503	CLIP-Seq	24297251	Bone marrow						hsa-miR-18b-5p
hsa-miR-1295a	MIMAT0005885	XIST	7503	CLIP-Seq	24297251	Bone marrow						hsa-miR-190a-5p
hsa-miR-130a-3p	MIMAT0000425	XIST	7503	CLIP-Seq	24297251	Bone marrow						hsa-miR-190b
hsa-miR-130a-3p	MIMAT0000425	XIST	7503	CLIP-Seq	24297251	Bone marrow						hsa-miR-191-5p
hsa-miR-130a-3p	MIMAT0000425	XIST	7503	CLIP-Seq	24297251	Bone marrow						hsa-miR-192-5p
hsa-miR-130a-5p	MIMAT0004593	XIST	7503	CLIP-Seq	24297251	Bone marrow						hsa-miR-193a-3p
hsa-miR-130a-5p	MIMAT0004593	XIST	7503	CLIP-Seq	24297251	Bone marrow						hsa-miR-193a-5p
hsa-miR-130a-5p	MIMAT0004593	XIST	7503	CLIP-Seq	24297251	Bone marrow						hsa-miR-193b-3p
hsa-miR-130a-5p	MIMAT0004593	XIST	7503	CLIP-Seq	24297251	Bone marrow						hsa-miR-194-5p
hsa-miR-130b-3p	MIMAT0000691	XIST	7503	CLIP-Seq	24297251	Bone marrow						hsa-miR-195-5p
hsa-miR-130b-3p	MIMAT0000691	XIST	7503	CLIP-Seq	24297251	Bone marrow						hsa-miR-196a-5p
hsa-miR-130b-3p	MIMAT0000691	XIST	7503	CLIP-Seq	24297251	Bone marrow						hsa-miR-196b-5p
hsa-miR-132-3p	MIMAT0000426	XIST	7503	CLIP-Seq	24297251	Bone marrow						hsa-miR-197-3p
hsa-miR-132-3p	MIMAT0000426	XIST	7503	CLIP-Seq	24297251	Bone marrow						hsa-miR-199a-3p
hsa-miR-132-3p	MIMAT0000426	XIST	7503	CLIP-Seq	24297251	Bone marrow						hsa-miR-199b-3p
hsa-miR-132-3p	MIMAT0000426	XIST	7503	CLIP-Seq	24297251	Bone marrow						hsa-miR-19a-3p
hsa-miR-132-3p	MIMAT0000426	XIST	7503	CLIP-Seq	24297251	Bone marrow						hsa-miR-19b-3p
hsa-miR-132-3p	MIMAT0000426	XIST	7503	CLIP-Seq	24297251	Bone marrow						hsa-miR-200a-3p
hsa-miR-136-5p	MIMAT0000448	XIST	7503	CLIP-Seq	24297251	Bone marrow						hsa-miR-200b-3p
hsa-miR-137	MIMAT0000429	XIST	7503	CLIP-Seq	24297251	Bone marrow						hsa-miR-200c-3p
hsa-miR-139-5p	MIMAT0000250	XIST	7503	CLIP-Seq	24297251	Bone marrow						hsa-miR-204-5p
hsa-miR-140-3p	MIMAT0004597	XIST	7503	CLIP-Seq	24297251	Bone marrow						hsa-miR-20a-5p
hsa-miR-140-5p	MIMAT0000431	XIST	7503	CLIP-Seq	24297251	Bone marrow						hsa-miR-20b-5p
hsa-miR-141-3p	MIMAT0000432	XIST	7503	CLIP-Seq	24297251	Bone marrow						hsa-miR-21-5p
hsa-miR-141-3p	MIMAT0000432	XIST	7503	CLIP-Seq	24297251	Bone marrow						hsa-miR-211-5p
hsa-miR-141-3p	MIMAT0000432	XIST	7503	CLIP-Seq	24297251	Bone marrow						hsa-miR-212-3p
hsa-miR-142-5p	MIMAT0000433	XIST	7503	CLIP-Seq	24297251	Bone marrow						hsa-miR-214-3p
hsa-miR-142-5p	MIMAT0000433	XIST	7503	CLIP-Seq	24297251	Bone marrow						hsa-miR-215-5p
hsa-miR-144-3p	MIMAT0000436	XIST	7503	CLIP-Seq	24297251	Bone marrow						hsa-miR-216a-5p
hsa-miR-144-3p	MIMAT0000436	XIST	7503	CLIP-Seq	24297251	Bone marrow						hsa-miR-219a-5p
hsa-miR-144-3p	MIMAT0000436	XIST	7503	CLIP-Seq	24297251	Bone marrow						hsa-miR-23a-3p
hsa-miR-144-5p	MIMAT0004600	XIST	7503	CLIP-Seq	24297251	Bone marrow						hsa-miR-23b-3p
hsa-miR-146a-5p	MIMAT0000449	XIST	7503	CLIP-Seq	24297251	Bone marrow						hsa-miR-23c
hsa-miR-146b-5p	MIMAT0002809	XIST	7503	CLIP-Seq	24297251	Bone marrow						hsa-miR-25-3p
hsa-miR-148a-3p	MIMAT0000243	XIST	7503	CLIP-Seq	24297251	Bone marrow						hsa-miR-2682-5p
hsa-miR-148b-3p	MIMAT0000759	XIST	7503	CLIP-Seq	24297251	Bone marrow						hsa-miR-27a-3p
hsa-miR-149-5p	MIMAT0000450	XIST	7503	CLIP-Seq	24297251	Bone marrow						hsa-miR-27b-3p
hsa-miR-150-5p	MIMAT0000451	XIST	7503	CLIP-Seq	24297251	Bone marrow						hsa-miR-28-5p
hsa-miR-151a-5p	MIMAT0004697	XIST	7503	CLIP-Seq	24297251	Bone marrow						hsa-miR-296-3p
hsa-miR-152-3p	MIMAT0000438	XIST	7503	CLIP-Seq	24297251	Bone marrow						hsa-miR-299-5p
hsa-miR-153-3p	MIMAT0000439	XIST	7503	CLIP-Seq	24297251	Bone marrow						hsa-miR-29a-3p
hsa-miR-153-3p	MIMAT0000439	XIST	7503	CLIP-Seq	24297251	Bone marrow						hsa-miR-29b-3p
hsa-miR-153-3p	MIMAT0000439	XIST	7503	CLIP-Seq	24297251	Bone marrow						hsa-miR-29c-3p
hsa-miR-154-3p	MIMAT0000453	XIST	7503	CLIP-Seq	24297251	Bone marrow						hsa-miR-301a-3p
hsa-miR-154-3p	MIMAT0000453	XIST	7503	CLIP-Seq	24297251	Bone marrow						hsa-miR-301b-3p
hsa-miR-154-5p	MIMAT0000452	XIST	7503	CLIP-Seq	24297251	Bone marrow						hsa-miR-302a-3p
hsa-miR-155-5p	MIMAT0000646	XIST	7503	CLIP-Seq	24297251	Bone marrow						hsa-miR-30a-5p
hsa-miR-155-5p	MIMAT0000646	XIST	7503	CLIP-Seq	24297251	Bone marrow						hsa-miR-30b-5p
hsa-miR-155-5p	MIMAT0000646	XIST	7503	CLIP-Seq	24297251	Bone marrow						hsa-miR-30c-5p
hsa-miR-155-5p	MIMAT0000646	XIST	7503	CLIP-Seq	24297251	Bone marrow						hsa-miR-30d-5p
hsa-miR-15a-5p	MIMAT0000068	XIST	7503	CLIP-Seq	24297251	Bone marrow						hsa-miR-30e-5p
hsa-miR-15a-5p	MIMAT0000068	XIST	7503	CLIP-Seq	24297251	Bone marrow						hsa-miR-31-5p
hsa-miR-15a-5p	MIMAT0000068	XIST	7503	CLIP-Seq	24297251	Bone marrow						hsa-miR-3179
hsa-miR-15a-5p	MIMAT0000068	XIST	7503	CLIP-Seq	24297251	Bone marrow						hsa-miR-3180
hsa-miR-15a-5p	MIMAT0000068	XIST	7503	CLIP-Seq	24297251	Bone marrow						hsa-miR-3180-3p
hsa-miR-15b-5p	MIMAT0000417	XIST	7503	CLIP-Seq	24297251	Bone marrow						hsa-miR-32-5p
hsa-miR-15b-5p	MIMAT0000417	XIST	7503	CLIP-Seq	24297251	Bone marrow						hsa-miR-3200-3p
hsa-miR-15b-5p	MIMAT0000417	XIST	7503	CLIP-Seq	24297251	Bone marrow						hsa-miR-320a
hsa-miR-15b-5p	MIMAT0000417	XIST	7503	CLIP-Seq	24297251	Bone marrow						hsa-miR-320b
hsa-miR-15b-5p	MIMAT0000417	XIST	7503	CLIP-Seq	24297251	Bone marrow						hsa-miR-320c
hsa-miR-16-5p	MIMAT0000069	XIST	7503	CLIP-Seq	24297251	Bone marrow						hsa-miR-320d
hsa-miR-16-5p	MIMAT0000069	XIST	7503	CLIP-Seq	24297251	Bone marrow						hsa-miR-323a-3p
hsa-miR-16-5p	MIMAT0000069	XIST	7503	CLIP-Seq	24297251	Bone marrow						hsa-miR-324-5p
hsa-miR-16-5p	MIMAT0000069	XIST	7503	CLIP-Seq	24297251	Bone marrow						hsa-miR-325
hsa-miR-16-5p	MIMAT0000069	XIST	7503	CLIP-Seq	24297251	Bone marrow						hsa-miR-329-3p
hsa-miR-17-5p	MIMAT0000070	XIST	7503	CLIP-Seq	24297251	Bone marrow						hsa-miR-330-3p
hsa-miR-17-5p	MIMAT0000070	XIST	7503	CLIP-Seq	24297251	Bone marrow						hsa-miR-330-5p
hsa-miR-17-5p	MIMAT0000070	XIST	7503	CLIP-Seq	24297251	Bone marrow						hsa-miR-331-3p
hsa-miR-17-5p	MIMAT0000070	XIST	7503	CLIP-Seq	24297251	Bone marrow						hsa-miR-335-5p
hsa-miR-181a-5p	MIMAT0000256	XIST	7503	CLIP-Seq	24297251	Bone marrow						hsa-miR-337-3p
hsa-miR-181a-5p	MIMAT0000256	XIST	7503	CLIP-Seq	24297251	Bone marrow						hsa-miR-338-3p
hsa-miR-181a-5p	MIMAT0000256	XIST	7503	CLIP-Seq	24297251	Bone marrow						hsa-miR-342-3p
hsa-miR-181b-5p	MIMAT0000257	XIST	7503	CLIP-Seq	24297251	Bone marrow						hsa-miR-34a-5p
hsa-miR-181b-5p	MIMAT0000257	XIST	7503	CLIP-Seq	24297251	Bone marrow						hsa-miR-34b-5p
hsa-miR-181b-5p	MIMAT0000257	XIST	7503	CLIP-Seq	24297251	Bone marrow						hsa-miR-34c-5p
hsa-miR-181c-5p	MIMAT0000258	XIST	7503	CLIP-Seq	24297251	Bone marrow						hsa-miR-361-3p
hsa-miR-181c-5p	MIMAT0000258	XIST	7503	CLIP-Seq	24297251	Bone marrow						hsa-miR-3613-5p
hsa-miR-181c-5p	MIMAT0000258	XIST	7503	CLIP-Seq	24297251	Bone marrow						hsa-miR-362-3p
hsa-miR-181d-5p	MIMAT0002821	XIST	7503	CLIP-Seq	24297251	Bone marrow						hsa-miR-362-5p
hsa-miR-181d-5p	MIMAT0002821	XIST	7503	CLIP-Seq	24297251	Bone marrow						hsa-miR-363-3p
hsa-miR-181d-5p	MIMAT0002821	XIST	7503	CLIP-Seq	24297251	Bone marrow						hsa-miR-365a-3p
hsa-miR-182-5p	MIMAT0000259	XIST	7503	CLIP-Seq	24297251	Bone marrow						hsa-miR-365b-3p
hsa-miR-185-5p	MIMAT0000455	XIST	7503	CLIP-Seq	24297251	Bone marrow						hsa-miR-369-3p
hsa-miR-185-5p	MIMAT0000455	XIST	7503	CLIP-Seq	24297251	Bone marrow						hsa-miR-370-3p
hsa-miR-185-5p	MIMAT0000455	XIST	7503	CLIP-Seq	24297251	Bone marrow						hsa-miR-371a-5p
hsa-miR-186-5p	MIMAT0000456	XIST	7503	CLIP-Seq	24297251	Bone marrow						hsa-miR-373-3p
hsa-miR-186-5p	MIMAT0000456	XIST	7503	CLIP-Seq	24297251	Bone marrow						hsa-miR-374a-3p
hsa-miR-186-5p	MIMAT0000456	XIST	7503	CLIP-Seq	24297251	Bone marrow						hsa-miR-374a-5p
hsa-miR-186-5p	MIMAT0000456	XIST	7503	CLIP-Seq	24297251	Bone marrow						hsa-miR-374b-5p
hsa-miR-186-5p	MIMAT0000456	XIST	7503	CLIP-Seq	24297251	Bone marrow						hsa-miR-374c-5p
hsa-miR-188-5p	MIMAT0000457	XIST	7503	CLIP-Seq	24297251	Bone marrow						hsa-miR-376c-3p
hsa-miR-188-5p	MIMAT0000457	XIST	7503	CLIP-Seq	24297251	Bone marrow						hsa-miR-377-3p
hsa-miR-188-5p	MIMAT0000457	XIST	7503	CLIP-Seq	24297251	Bone marrow						hsa-miR-379-3p
hsa-miR-18a-5p	MIMAT0000072	XIST	7503	CLIP-Seq	24297251	Bone marrow						hsa-miR-379-5p
hsa-miR-18a-5p	MIMAT0000072	XIST	7503	CLIP-Seq	24297251	Bone marrow						hsa-miR-381-3p
hsa-miR-18a-5p	MIMAT0000072	XIST	7503	CLIP-Seq	24297251	Bone marrow						hsa-miR-409-3p
hsa-miR-18a-5p	MIMAT0000072	XIST	7503	CLIP-Seq	24297251	Bone marrow						hsa-miR-409-5p
hsa-miR-18a-5p	MIMAT0000072	XIST	7503	CLIP-Seq	24297251	Bone marrow						hsa-miR-410-3p
hsa-miR-18b-5p	MIMAT0001412	XIST	7503	CLIP-Seq	24297251	Bone marrow						hsa-miR-411-3p
hsa-miR-18b-5p	MIMAT0001412	XIST	7503	CLIP-Seq	24297251	Bone marrow						hsa-miR-421
hsa-miR-18b-5p	MIMAT0001412	XIST	7503	CLIP-Seq	24297251	Bone marrow						hsa-miR-423-5p
hsa-miR-18b-5p	MIMAT0001412	XIST	7503	CLIP-Seq	24297251	Bone marrow						hsa-miR-424-5p
hsa-miR-18b-5p	MIMAT0001412	XIST	7503	CLIP-Seq	24297251	Bone marrow						hsa-miR-425-5p
hsa-miR-190a-5p	MIMAT0000458	XIST	7503	CLIP-Seq	24297251	Bone marrow						hsa-miR-432-5p
hsa-miR-190b	MIMAT0004929	XIST	7503	CLIP-Seq	24297251	Bone marrow						hsa-miR-449a
hsa-miR-191-5p	MIMAT0000440	XIST	7503	CLIP-Seq	24297251	Bone marrow						hsa-miR-449b-5p
hsa-miR-191-5p	MIMAT0000440	XIST	7503	CLIP-Seq	24297251	Bone marrow						hsa-miR-449c-5p
hsa-miR-192-5p	MIMAT0000222	XIST	7503	CLIP-Seq	24297251	Bone marrow						hsa-miR-450b-5p
hsa-miR-193a-3p	MIMAT0000459	XIST	7503	CLIP-Seq	24297251	Bone marrow						hsa-miR-452-5p
hsa-miR-193a-5p	MIMAT0004614	XIST	7503	CLIP-Seq	24297251	Bone marrow						hsa-miR-454-3p
hsa-miR-193a-5p	MIMAT0004614	XIST	7503	CLIP-Seq	24297251	Bone marrow						hsa-miR-455-3p
hsa-miR-193a-5p	MIMAT0004614	XIST	7503	CLIP-Seq	24297251	Bone marrow						hsa-miR-483-5p
hsa-miR-193a-5p	MIMAT0004614	XIST	7503	CLIP-Seq	24297251	Bone marrow						hsa-miR-485-3p
hsa-miR-193a-5p	MIMAT0004614	XIST	7503	CLIP-Seq	24297251	Bone marrow						hsa-miR-485-5p
hsa-miR-193a-5p	MIMAT0004614	XIST	7503	CLIP-Seq	24297251	Bone marrow						hsa-miR-486-5p
hsa-miR-193a-5p	MIMAT0004614	XIST	7503	CLIP-Seq	24297251	Bone marrow						hsa-miR-487a-3p
hsa-miR-193a-5p	MIMAT0004614	XIST	7503	CLIP-Seq	24297251	Bone marrow						hsa-miR-488-3p
hsa-miR-193b-3p	MIMAT0002819	XIST	7503	CLIP-Seq	24297251	Bone marrow						hsa-miR-489-3p
hsa-miR-194-5p	MIMAT0000460	XIST	7503	CLIP-Seq	24297251	Bone marrow						hsa-miR-490-3p
hsa-miR-195-5p	MIMAT0000461	XIST	7503	CLIP-Seq	24297251	Bone marrow						hsa-miR-491-5p
hsa-miR-195-5p	MIMAT0000461	XIST	7503	CLIP-Seq	24297251	Bone marrow						hsa-miR-494-3p
hsa-miR-195-5p	MIMAT0000461	XIST	7503	CLIP-Seq	24297251	Bone marrow						hsa-miR-495-3p
hsa-miR-195-5p	MIMAT0000461	XIST	7503	CLIP-Seq	24297251	Bone marrow						hsa-miR-497-5p
hsa-miR-195-5p	MIMAT0000461	XIST	7503	CLIP-Seq	24297251	Bone marrow						hsa-miR-498
hsa-miR-196a-5p	MIMAT0000226	XIST	7503	CLIP-Seq	24297251	Bone marrow						hsa-miR-500a-3p
hsa-miR-196a-5p	MIMAT0000226	XIST	7503	CLIP-Seq	24297251	Bone marrow						hsa-miR-500b-5p
hsa-miR-196a-5p	MIMAT0000226	XIST	7503	CLIP-Seq	24297251	Bone marrow						hsa-miR-501-3p
hsa-miR-196b-5p	MIMAT0001080	XIST	7503	CLIP-Seq	24297251	Bone marrow						hsa-miR-502-3p
hsa-miR-196b-5p	MIMAT0001080	XIST	7503	CLIP-Seq	24297251	Bone marrow						hsa-miR-505-3p
hsa-miR-196b-5p	MIMAT0001080	XIST	7503	CLIP-Seq	24297251	Bone marrow						hsa-miR-506-3p
hsa-miR-197-3p	MIMAT0000227	XIST	7503	CLIP-Seq	24297251	Bone marrow						hsa-miR-510-5p
hsa-miR-199a-3p	MIMAT0000232	XIST	7503	CLIP-Seq	24297251	Bone marrow						hsa-miR-512-3p
hsa-miR-199b-3p	MIMAT0004563	XIST	7503	CLIP-Seq	24297251	Bone marrow						hsa-miR-513b-5p
hsa-miR-19a-3p	MIMAT0000073	XIST	7503	CLIP-Seq	24297251	Bone marrow						hsa-miR-513c-5p
hsa-miR-19a-3p	MIMAT0000073	XIST	7503	CLIP-Seq	24297251	Bone marrow						hsa-miR-516b-5p
hsa-miR-19a-3p	MIMAT0000073	XIST	7503	CLIP-Seq	24297251	Bone marrow						hsa-miR-518a-3p
hsa-miR-19b-3p	MIMAT0000074	XIST	7503	CLIP-Seq	24297251	Bone marrow						hsa-miR-518d-5p
hsa-miR-19b-3p	MIMAT0000074	XIST	7503	CLIP-Seq	24297251	Bone marrow						hsa-miR-518f-5p
hsa-miR-19b-3p	MIMAT0000074	XIST	7503	CLIP-Seq	24297251	Bone marrow						hsa-miR-519d-3p
hsa-miR-200a-3p	MIMAT0000682	XIST	7503	CLIP-Seq	24297251	Bone marrow						hsa-miR-520c-5p
hsa-miR-200a-3p	MIMAT0000682	XIST	7503	CLIP-Seq	24297251	Bone marrow						hsa-miR-520d-5p
hsa-miR-200a-3p	MIMAT0000682	XIST	7503	CLIP-Seq	24297251	Bone marrow						hsa-miR-520h
hsa-miR-200b-3p	MIMAT0000318	XIST	7503	CLIP-Seq	24297251	Bone marrow						hsa-miR-526a
hsa-miR-200b-3p	MIMAT0000318	XIST	7503	CLIP-Seq	24297251	Bone marrow						hsa-miR-526b-5p
hsa-miR-200b-3p	MIMAT0000318	XIST	7503	CLIP-Seq	24297251	Bone marrow						hsa-miR-532-5p
hsa-miR-200c-3p	MIMAT0000617	XIST	7503	CLIP-Seq	24297251	Bone marrow						hsa-miR-541-3p
hsa-miR-200c-3p	MIMAT0000617	XIST	7503	CLIP-Seq	24297251	Bone marrow						hsa-miR-542-3p
hsa-miR-200c-3p	MIMAT0000617	XIST	7503	CLIP-Seq	24297251	Bone marrow						hsa-miR-543
hsa-miR-204-5p	MIMAT0000265	XIST	7503	CLIP-Seq	24297251	Bone marrow						hsa-miR-545-3p
hsa-miR-204-5p	MIMAT0000265	XIST	7503	CLIP-Seq	24297251	Bone marrow						hsa-miR-552-3p
hsa-miR-20a-5p	MIMAT0000075	XIST	7503	CLIP-Seq	24297251	Bone marrow						hsa-miR-574-5p
hsa-miR-20a-5p	MIMAT0000075	XIST	7503	CLIP-Seq	24297251	Bone marrow						hsa-miR-577
hsa-miR-20a-5p	MIMAT0000075	XIST	7503	CLIP-Seq	24297251	Bone marrow						hsa-miR-582-5p
hsa-miR-20a-5p	MIMAT0000075	XIST	7503	CLIP-Seq	24297251	Bone marrow						hsa-miR-590-5p
hsa-miR-20b-5p	MIMAT0001413	XIST	7503	CLIP-Seq	24297251	Bone marrow						hsa-miR-615-3p
hsa-miR-20b-5p	MIMAT0001413	XIST	7503	CLIP-Seq	24297251	Bone marrow						hsa-miR-624-3p
hsa-miR-20b-5p	MIMAT0001413	XIST	7503	CLIP-Seq	24297251	Bone marrow						hsa-miR-625-3p
hsa-miR-20b-5p	MIMAT0001413	XIST	7503	CLIP-Seq	24297251	Bone marrow						hsa-miR-625-5p
hsa-miR-21-5p	MIMAT0000076	XIST	7503	CLIP-Seq	24297251	Bone marrow						hsa-miR-629-5p
hsa-miR-211-5p	MIMAT0000268	XIST	7503	CLIP-Seq	24297251	Bone marrow						hsa-miR-651-5p
hsa-miR-211-5p	MIMAT0000268	XIST	7503	CLIP-Seq	24297251	Bone marrow						hsa-miR-653-5p
hsa-miR-212-3p	MIMAT0000269	XIST	7503	CLIP-Seq	24297251	Bone marrow						hsa-miR-654-3p
hsa-miR-212-3p	MIMAT0000269	XIST	7503	CLIP-Seq	24297251	Bone marrow						hsa-miR-654-5p
hsa-miR-212-3p	MIMAT0000269	XIST	7503	CLIP-Seq	24297251	Bone marrow						hsa-miR-655-3p
hsa-miR-212-3p	MIMAT0000269	XIST	7503	CLIP-Seq	24297251	Bone marrow						hsa-miR-663a
hsa-miR-212-3p	MIMAT0000269	XIST	7503	CLIP-Seq	24297251	Bone marrow						hsa-miR-665
hsa-miR-212-3p	MIMAT0000269	XIST	7503	CLIP-Seq	24297251	Bone marrow						hsa-miR-671-5p
hsa-miR-214-3p	MIMAT0000271	XIST	7503	CLIP-Seq	24297251	Bone marrow						hsa-miR-7-5p
hsa-miR-214-3p	MIMAT0000271	XIST	7503	CLIP-Seq	24297251	Bone marrow						hsa-miR-708-5p
hsa-miR-214-3p	MIMAT0000271	XIST	7503	CLIP-Seq	24297251	Bone marrow						hsa-miR-758-3p
hsa-miR-215-5p	MIMAT0000272	XIST	7503	CLIP-Seq	24297251	Bone marrow						hsa-miR-761
hsa-miR-216a-5p	MIMAT0000273	XIST	7503	CLIP-Seq	24297251	Bone marrow						hsa-miR-802
hsa-miR-216a-5p	MIMAT0000273	XIST	7503	CLIP-Seq	24297251	Bone marrow						hsa-miR-873-5p
hsa-miR-219a-5p	MIMAT0000276	XIST	7503	CLIP-Seq	24297251	Bone marrow						hsa-miR-877-5p
hsa-miR-219a-5p	MIMAT0000276	XIST	7503	CLIP-Seq	24297251	Bone marrow						hsa-miR-889-3p
hsa-miR-219a-5p	MIMAT0000276	XIST	7503	CLIP-Seq	24297251	Bone marrow						hsa-miR-9-3p
hsa-miR-219a-5p	MIMAT0000276	XIST	7503	CLIP-Seq	24297251	Bone marrow						hsa-miR-9-5p
hsa-miR-23a-3p	MIMAT0000078	XIST	7503	CLIP-Seq	24297251	Bone marrow						hsa-miR-92a-3p
hsa-miR-23a-3p	MIMAT0000078	XIST	7503	CLIP-Seq	24297251	Bone marrow						hsa-miR-92b-3p
hsa-miR-23a-3p	MIMAT0000078	XIST	7503	CLIP-Seq	24297251	Bone marrow						hsa-miR-93-5p
hsa-miR-23a-3p	MIMAT0000078	XIST	7503	CLIP-Seq	24297251	Bone marrow						hsa-miR-941
hsa-miR-23b-3p	MIMAT0000418	XIST	7503	CLIP-Seq	24297251	Bone marrow						hsa-miR-96-5p
hsa-miR-23b-3p	MIMAT0000418	XIST	7503	CLIP-Seq	24297251	Bone marrow						hsa-miR-98-5p
hsa-miR-23b-3p	MIMAT0000418	XIST	7503	CLIP-Seq	24297251	Bone marrow
hsa-miR-23b-3p	MIMAT0000418	XIST	7503	CLIP-Seq	24297251	Bone marrow
hsa-miR-23c	MIMAT0018000	XIST	7503	CLIP-Seq	24297251	Bone marrow
hsa-miR-23c	MIMAT0018000	XIST	7503	CLIP-Seq	24297251	Bone marrow
hsa-miR-23c	MIMAT0018000	XIST	7503	CLIP-Seq	24297251	Bone marrow
hsa-miR-23c	MIMAT0018000	XIST	7503	CLIP-Seq	24297251	Bone marrow
hsa-miR-25-3p	MIMAT0000081	XIST	7503	CLIP-Seq	24297251	Bone marrow
hsa-miR-25-3p	MIMAT0000081	XIST	7503	CLIP-Seq	24297251	Bone marrow
hsa-miR-2682-5p	MIMAT0013517	XIST	7503	CLIP-Seq	24297251	Bone marrow
hsa-miR-27a-3p	MIMAT0000084	XIST	7503	CLIP-Seq	24297251	Bone marrow
hsa-miR-27a-3p	MIMAT0000084	XIST	7503	CLIP-Seq	24297251	Bone marrow
hsa-miR-27b-3p	MIMAT0000419	XIST	7503	CLIP-Seq	24297251	Bone marrow
hsa-miR-27b-3p	MIMAT0000419	XIST	7503	CLIP-Seq	24297251	Bone marrow
hsa-miR-28-5p	MIMAT0000085	XIST	7503	CLIP-Seq	24297251	Bone marrow
hsa-miR-296-3p	MIMAT0004679	XIST	7503	CLIP-Seq	24297251	Bone marrow
hsa-miR-296-3p	MIMAT0004679	XIST	7503	CLIP-Seq	24297251	Bone marrow
hsa-miR-296-3p	MIMAT0004679	XIST	7503	CLIP-Seq	24297251	Bone marrow
hsa-miR-299-5p	MIMAT0002890	XIST	7503	CLIP-Seq	24297251	Bone marrow
hsa-miR-29a-3p	MIMAT0000086	XIST	7503	CLIP-Seq	24297251	Bone marrow
hsa-miR-29b-3p	MIMAT0000100	XIST	7503	CLIP-Seq	24297251	Bone marrow
hsa-miR-29c-3p	MIMAT0000681	XIST	7503	CLIP-Seq	24297251	Bone marrow
hsa-miR-301a-3p	MIMAT0000688	XIST	7503	CLIP-Seq	24297251	Bone marrow
hsa-miR-301a-3p	MIMAT0000688	XIST	7503	CLIP-Seq	24297251	Bone marrow
hsa-miR-301a-3p	MIMAT0000688	XIST	7503	CLIP-Seq	24297251	Bone marrow
hsa-miR-301b-3p	MIMAT0004958	XIST	7503	CLIP-Seq	24297251	Bone marrow
hsa-miR-301b-3p	MIMAT0004958	XIST	7503	CLIP-Seq	24297251	Bone marrow
hsa-miR-301b-3p	MIMAT0004958	XIST	7503	CLIP-Seq	24297251	Bone marrow
hsa-miR-302a-3p	MIMAT0000684	XIST	7503	CLIP-Seq	24297251	Bone marrow
hsa-miR-302a-3p	MIMAT0000684	XIST	7503	CLIP-Seq	24297251	Bone marrow
hsa-miR-302a-3p	MIMAT0000684	XIST	7503	CLIP-Seq	24297251	Bone marrow
hsa-miR-30a-5p	MIMAT0000087	XIST	7503	CLIP-Seq	24297251	Bone marrow
hsa-miR-30a-5p	MIMAT0000087	XIST	7503	CLIP-Seq	24297251	Bone marrow
hsa-miR-30b-5p	MIMAT0000420	XIST	7503	CLIP-Seq	24297251	Bone marrow
hsa-miR-30b-5p	MIMAT0000420	XIST	7503	CLIP-Seq	24297251	Bone marrow
hsa-miR-30c-5p	MIMAT0000244	XIST	7503	CLIP-Seq	24297251	Bone marrow
hsa-miR-30c-5p	MIMAT0000244	XIST	7503	CLIP-Seq	24297251	Bone marrow
hsa-miR-30d-5p	MIMAT0000245	XIST	7503	CLIP-Seq	24297251	Bone marrow
hsa-miR-30d-5p	MIMAT0000245	XIST	7503	CLIP-Seq	24297251	Bone marrow
hsa-miR-30e-5p	MIMAT0000692	XIST	7503	CLIP-Seq	24297251	Bone marrow
hsa-miR-30e-5p	MIMAT0000692	XIST	7503	CLIP-Seq	24297251	Bone marrow
hsa-miR-31-5p	MIMAT0000089	XIST	7503	CLIP-Seq	24297251	Bone marrow
hsa-miR-31-5p	MIMAT0000089	XIST	7503	CLIP-Seq	24297251	Bone marrow
hsa-miR-3179	MIMAT0015056	XIST	7503	CLIP-Seq	24297251	Bone marrow
hsa-miR-3179	MIMAT0015056	XIST	7503	CLIP-Seq	24297251	Bone marrow
hsa-miR-3179	MIMAT0015056	XIST	7503	CLIP-Seq	24297251	Bone marrow
hsa-miR-3179	MIMAT0015056	XIST	7503	CLIP-Seq	24297251	Bone marrow
hsa-miR-3179	MIMAT0015056	XIST	7503	CLIP-Seq	24297251	Bone marrow
hsa-miR-3180	MIMAT0018178	XIST	7503	CLIP-Seq	24297251	Bone marrow
hsa-miR-3180	MIMAT0018178	XIST	7503	CLIP-Seq	24297251	Bone marrow
hsa-miR-3180-3p	MIMAT0015058	XIST	7503	CLIP-Seq	24297251	Bone marrow
hsa-miR-3180-3p	MIMAT0015058	XIST	7503	CLIP-Seq	24297251	Bone marrow
hsa-miR-32-5p	MIMAT0000090	XIST	7503	CLIP-Seq	24297251	Bone marrow
hsa-miR-32-5p	MIMAT0000090	XIST	7503	CLIP-Seq	24297251	Bone marrow
hsa-miR-3200-3p	MIMAT0015085	XIST	7503	CLIP-Seq	24297251	Bone marrow
hsa-miR-3200-3p	MIMAT0015085	XIST	7503	CLIP-Seq	24297251	Bone marrow
hsa-miR-320a	MIMAT0000510	XIST	7503	CLIP-Seq	24297251	Bone marrow
hsa-miR-320b	MIMAT0005792	XIST	7503	CLIP-Seq	24297251	Bone marrow
hsa-miR-320c	MIMAT0005793	XIST	7503	CLIP-Seq	24297251	Bone marrow
hsa-miR-320c	MIMAT0005793	XIST	7503	CLIP-Seq	24297251	Bone marrow
hsa-miR-320d	MIMAT0006764	XIST	7503	CLIP-Seq	24297251	Bone marrow
hsa-miR-320d	MIMAT0006764	XIST	7503	CLIP-Seq	24297251	Bone marrow
hsa-miR-323a-3p	MIMAT0000755	XIST	7503	CLIP-Seq	24297251	Bone marrow
hsa-miR-324-5p	MIMAT0000761	XIST	7503	CLIP-Seq	24297251	Bone marrow
hsa-miR-324-5p	MIMAT0000761	XIST	7503	CLIP-Seq	24297251	Bone marrow
hsa-miR-325	MIMAT0000771	XIST	7503	CLIP-Seq	24297251	Bone marrow
hsa-miR-325	MIMAT0000771	XIST	7503	CLIP-Seq	24297251	Bone marrow
hsa-miR-329-3p	MIMAT0001629	XIST	7503	CLIP-Seq	24297251	Bone marrow
hsa-miR-329-3p	MIMAT0001629	XIST	7503	CLIP-Seq	24297251	Bone marrow
hsa-miR-330-3p	MIMAT0000751	XIST	7503	CLIP-Seq	24297251	Bone marrow
hsa-miR-330-3p	MIMAT0000751	XIST	7503	CLIP-Seq	24297251	Bone marrow
hsa-miR-330-3p	MIMAT0000751	XIST	7503	CLIP-Seq	24297251	Bone marrow
hsa-miR-330-3p	MIMAT0000751	XIST	7503	CLIP-Seq	24297251	Bone marrow
hsa-miR-330-3p	MIMAT0000751	XIST	7503	CLIP-Seq	24297251	Bone marrow
hsa-miR-330-3p	MIMAT0000751	XIST	7503	CLIP-Seq	24297251	Bone marrow
hsa-miR-330-5p	MIMAT0004693	XIST	7503	CLIP-Seq	24297251	Bone marrow
hsa-miR-330-5p	MIMAT0004693	XIST	7503	CLIP-Seq	24297251	Bone marrow
hsa-miR-330-5p	MIMAT0004693	XIST	7503	CLIP-Seq	24297251	Bone marrow
hsa-miR-331-3p	MIMAT0000760	XIST	7503	CLIP-Seq	24297251	Bone marrow
hsa-miR-335-5p	MIMAT0000765	XIST	7503	CLIP-Seq	24297251	Bone marrow
hsa-miR-335-5p	MIMAT0000765	XIST	7503	CLIP-Seq	24297251	Bone marrow
hsa-miR-337-3p	MIMAT0000754	XIST	7503	CLIP-Seq	24297251	Bone marrow
hsa-miR-338-3p	MIMAT0000763	XIST	7503	CLIP-Seq	24297251	Bone marrow
hsa-miR-338-3p	MIMAT0000763	XIST	7503	CLIP-Seq	24297251	Bone marrow
hsa-miR-338-3p	MIMAT0000763	XIST	7503	CLIP-Seq	24297251	Bone marrow
hsa-miR-342-3p	MIMAT0000753	XIST	7503	CLIP-Seq	24297251	Bone marrow
hsa-miR-342-3p	MIMAT0000753	XIST	7503	CLIP-Seq	24297251	Bone marrow
hsa-miR-34a-5p	MIMAT0000255	XIST	7503	CLIP-Seq	24297251	Bone marrow
hsa-miR-34b-5p	MIMAT0000685	XIST	7503	CLIP-Seq	24297251	Bone marrow
hsa-miR-34c-5p	MIMAT0000686	XIST	7503	CLIP-Seq	24297251	Bone marrow
hsa-miR-361-3p	MIMAT0004682	XIST	7503	CLIP-Seq	24297251	Bone marrow
hsa-miR-3613-5p	MIMAT0017990	XIST	7503	CLIP-Seq	24297251	Bone marrow
hsa-miR-362-3p	MIMAT0004683	XIST	7503	CLIP-Seq	24297251	Bone marrow
hsa-miR-362-3p	MIMAT0004683	XIST	7503	CLIP-Seq	24297251	Bone marrow
hsa-miR-362-5p	MIMAT0000705	XIST	7503	CLIP-Seq	24297251	Bone marrow
hsa-miR-362-5p	MIMAT0000705	XIST	7503	CLIP-Seq	24297251	Bone marrow
hsa-miR-362-5p	MIMAT0000705	XIST	7503	CLIP-Seq	24297251	Bone marrow
hsa-miR-363-3p	MIMAT0000707	XIST	7503	CLIP-Seq	24297251	Bone marrow
hsa-miR-363-3p	MIMAT0000707	XIST	7503	CLIP-Seq	24297251	Bone marrow
hsa-miR-365a-3p	MIMAT0000710	XIST	7503	CLIP-Seq	24297251	Bone marrow
hsa-miR-365b-3p	MIMAT0022834	XIST	7503	CLIP-Seq	24297251	Bone marrow
hsa-miR-369-3p	MIMAT0000721	XIST	7503	CLIP-Seq	24297251	Bone marrow
hsa-miR-369-3p	MIMAT0000721	XIST	7503	CLIP-Seq	24297251	Bone marrow
hsa-miR-369-3p	MIMAT0000721	XIST	7503	CLIP-Seq	24297251	Bone marrow
hsa-miR-370-3p	MIMAT0000722	XIST	7503	CLIP-Seq	24297251	Bone marrow
hsa-miR-370-3p	MIMAT0000722	XIST	7503	CLIP-Seq	24297251	Bone marrow
hsa-miR-370-3p	MIMAT0000722	XIST	7503	CLIP-Seq	24297251	Bone marrow
hsa-miR-370-3p	MIMAT0000722	XIST	7503	CLIP-Seq	24297251	Bone marrow
hsa-miR-370-3p	MIMAT0000722	XIST	7503	CLIP-Seq	24297251	Bone marrow
hsa-miR-370-3p	MIMAT0000722	XIST	7503	CLIP-Seq	24297251	Bone marrow
hsa-miR-370-3p	MIMAT0000722	XIST	7503	CLIP-Seq	24297251	Bone marrow
hsa-miR-370-3p	MIMAT0000722	XIST	7503	CLIP-Seq	24297251	Bone marrow
hsa-miR-370-3p	MIMAT0000722	XIST	7503	CLIP-Seq	24297251	Bone marrow
hsa-miR-370-3p	MIMAT0000722	XIST	7503	CLIP-Seq	24297251	Bone marrow
hsa-miR-370-3p	MIMAT0000722	XIST	7503	CLIP-Seq	24297251	Bone marrow
hsa-miR-370-3p	MIMAT0000722	XIST	7503	CLIP-Seq	24297251	Bone marrow
hsa-miR-370-3p	MIMAT0000722	XIST	7503	CLIP-Seq	24297251	Bone marrow
hsa-miR-370-3p	MIMAT0000722	XIST	7503	CLIP-Seq	24297251	Bone marrow
hsa-miR-371a-5p	MIMAT0004687	XIST	7503	CLIP-Seq	24297251	Bone marrow
hsa-miR-371a-5p	MIMAT0004687	XIST	7503	CLIP-Seq	24297251	Bone marrow
hsa-miR-373-3p	MIMAT0000726	XIST	7503	CLIP-Seq	24297251	Bone marrow
hsa-miR-373-3p	MIMAT0000726	XIST	7503	CLIP-Seq	24297251	Bone marrow
hsa-miR-373-3p	MIMAT0000726	XIST	7503	CLIP-Seq	24297251	Bone marrow
hsa-miR-373-3p	MIMAT0000726	XIST	7503	CLIP-Seq	24297251	Bone marrow
hsa-miR-374a-3p	MIMAT0004688	XIST	7503	CLIP-Seq	24297251	Bone marrow
hsa-miR-374a-3p	MIMAT0004688	XIST	7503	CLIP-Seq	24297251	Bone marrow
hsa-miR-374a-3p	MIMAT0004688	XIST	7503	CLIP-Seq	24297251	Bone marrow
hsa-miR-374a-3p	MIMAT0004688	XIST	7503	CLIP-Seq	24297251	Bone marrow
hsa-miR-374a-3p	MIMAT0004688	XIST	7503	CLIP-Seq	24297251	Bone marrow
hsa-miR-374a-5p	MIMAT0000727	XIST	7503	CLIP-Seq	24297251	Bone marrow
hsa-miR-374a-5p	MIMAT0000727	XIST	7503	CLIP-Seq	24297251	Bone marrow
hsa-miR-374a-5p	MIMAT0000727	XIST	7503	CLIP-Seq	24297251	Bone marrow
hsa-miR-374a-5p	MIMAT0000727	XIST	7503	CLIP-Seq	24297251	Bone marrow
hsa-miR-374a-5p	MIMAT0000727	XIST	7503	CLIP-Seq	24297251	Bone marrow
hsa-miR-374b-5p	MIMAT0004955	XIST	7503	CLIP-Seq	24297251	Bone marrow
hsa-miR-374b-5p	MIMAT0004955	XIST	7503	CLIP-Seq	24297251	Bone marrow
hsa-miR-374b-5p	MIMAT0004955	XIST	7503	CLIP-Seq	24297251	Bone marrow
hsa-miR-374b-5p	MIMAT0004955	XIST	7503	CLIP-Seq	24297251	Bone marrow
hsa-miR-374b-5p	MIMAT0004955	XIST	7503	CLIP-Seq	24297251	Bone marrow
hsa-miR-374c-5p	MIMAT0018443	XIST	7503	CLIP-Seq	24297251	Bone marrow
hsa-miR-374c-5p	MIMAT0018443	XIST	7503	CLIP-Seq	24297251	Bone marrow
hsa-miR-374c-5p	MIMAT0018443	XIST	7503	CLIP-Seq	24297251	Bone marrow
hsa-miR-374c-5p	MIMAT0018443	XIST	7503	CLIP-Seq	24297251	Bone marrow
hsa-miR-376c-3p	MIMAT0000720	XIST	7503	CLIP-Seq	24297251	Bone marrow
hsa-miR-377-3p	MIMAT0000730	XIST	7503	CLIP-Seq	24297251	Bone marrow
hsa-miR-377-3p	MIMAT0000730	XIST	7503	CLIP-Seq	24297251	Bone marrow
hsa-miR-377-3p	MIMAT0000730	XIST	7503	CLIP-Seq	24297251	Bone marrow
hsa-miR-377-3p	MIMAT0000730	XIST	7503	CLIP-Seq	24297251	Bone marrow
hsa-miR-377-3p	MIMAT0000730	XIST	7503	CLIP-Seq	24297251	Bone marrow
hsa-miR-377-3p	MIMAT0000730	XIST	7503	CLIP-Seq	24297251	Bone marrow
hsa-miR-379-3p	MIMAT0004690	XIST	7503	CLIP-Seq	24297251	Bone marrow
hsa-miR-379-5p	MIMAT0000733	XIST	7503	CLIP-Seq	24297251	Bone marrow
hsa-miR-381-3p	MIMAT0000736	XIST	7503	CLIP-Seq	24297251	Bone marrow
hsa-miR-381-3p	MIMAT0000736	XIST	7503	CLIP-Seq	24297251	Bone marrow
hsa-miR-409-3p	MIMAT0001639	XIST	7503	CLIP-Seq	24297251	Bone marrow
hsa-miR-409-5p	MIMAT0001638	XIST	7503	CLIP-Seq	24297251	Bone marrow
hsa-miR-410-3p	MIMAT0002171	XIST	7503	CLIP-Seq	24297251	Bone marrow
hsa-miR-411-3p	MIMAT0004813	XIST	7503	CLIP-Seq	24297251	Bone marrow
hsa-miR-421	MIMAT0003339	XIST	7503	CLIP-Seq	24297251	Bone marrow
hsa-miR-421	MIMAT0003339	XIST	7503	CLIP-Seq	24297251	Bone marrow
hsa-miR-423-5p	MIMAT0004748	XIST	7503	CLIP-Seq	24297251	Bone marrow
hsa-miR-423-5p	MIMAT0004748	XIST	7503	CLIP-Seq	24297251	Bone marrow
hsa-miR-424-5p	MIMAT0001341	XIST	7503	CLIP-Seq	24297251	Bone marrow
hsa-miR-424-5p	MIMAT0001341	XIST	7503	CLIP-Seq	24297251	Bone marrow
hsa-miR-424-5p	MIMAT0001341	XIST	7503	CLIP-Seq	24297251	Bone marrow
hsa-miR-424-5p	MIMAT0001341	XIST	7503	CLIP-Seq	24297251	Bone marrow
hsa-miR-424-5p	MIMAT0001341	XIST	7503	CLIP-Seq	24297251	Bone marrow
hsa-miR-425-5p	MIMAT0003393	XIST	7503	CLIP-Seq	24297251	Bone marrow
hsa-miR-425-5p	MIMAT0003393	XIST	7503	CLIP-Seq	24297251	Bone marrow
hsa-miR-432-5p	MIMAT0002814	XIST	7503	CLIP-Seq	24297251	Bone marrow
hsa-miR-449a	MIMAT0001541	XIST	7503	CLIP-Seq	24297251	Bone marrow
hsa-miR-449b-5p	MIMAT0003327	XIST	7503	CLIP-Seq	24297251	Bone marrow
hsa-miR-449c-5p	MIMAT0010251	XIST	7503	CLIP-Seq	24297251	Bone marrow
hsa-miR-450b-5p	MIMAT0004909	XIST	7503	CLIP-Seq	24297251	Bone marrow
hsa-miR-450b-5p	MIMAT0004909	XIST	7503	CLIP-Seq	24297251	Bone marrow
hsa-miR-452-5p	MIMAT0001635	XIST	7503	CLIP-Seq	24297251	Bone marrow
hsa-miR-452-5p	MIMAT0001635	XIST	7503	CLIP-Seq	24297251	Bone marrow
hsa-miR-452-5p	MIMAT0001635	XIST	7503	CLIP-Seq	24297251	Bone marrow
hsa-miR-454-3p	MIMAT0003885	XIST	7503	CLIP-Seq	24297251	Bone marrow
hsa-miR-454-3p	MIMAT0003885	XIST	7503	CLIP-Seq	24297251	Bone marrow
hsa-miR-454-3p	MIMAT0003885	XIST	7503	CLIP-Seq	24297251	Bone marrow
hsa-miR-455-3p	MIMAT0004784	XIST	7503	CLIP-Seq	24297251	Bone marrow
hsa-miR-455-3p	MIMAT0004784	XIST	7503	CLIP-Seq	24297251	Bone marrow
hsa-miR-455-3p	MIMAT0004784	XIST	7503	CLIP-Seq	24297251	Bone marrow
hsa-miR-483-5p	MIMAT0004761	XIST	7503	CLIP-Seq	24297251	Bone marrow
hsa-miR-485-3p	MIMAT0002176	XIST	7503	CLIP-Seq	24297251	Bone marrow
hsa-miR-485-3p	MIMAT0002176	XIST	7503	CLIP-Seq	24297251	Bone marrow
hsa-miR-485-3p	MIMAT0002176	XIST	7503	CLIP-Seq	24297251	Bone marrow
hsa-miR-485-5p	MIMAT0002175	XIST	7503	CLIP-Seq	24297251	Bone marrow
hsa-miR-486-5p	MIMAT0002177	XIST	7503	CLIP-Seq	24297251	Bone marrow
hsa-miR-487a-3p	MIMAT0002178	XIST	7503	CLIP-Seq	24297251	Bone marrow
hsa-miR-487a-3p	MIMAT0002178	XIST	7503	CLIP-Seq	24297251	Bone marrow
hsa-miR-488-3p	MIMAT0004763	XIST	7503	CLIP-Seq	24297251	Bone marrow
hsa-miR-488-3p	MIMAT0004763	XIST	7503	CLIP-Seq	24297251	Bone marrow
hsa-miR-489-3p	MIMAT0002805	XIST	7503	CLIP-Seq	24297251	Bone marrow
hsa-miR-489-3p	MIMAT0002805	XIST	7503	CLIP-Seq	24297251	Bone marrow
hsa-miR-489-3p	MIMAT0002805	XIST	7503	CLIP-Seq	24297251	Bone marrow
hsa-miR-490-3p	MIMAT0002806	XIST	7503	CLIP-Seq	24297251	Bone marrow
hsa-miR-490-3p	MIMAT0002806	XIST	7503	CLIP-Seq	24297251	Bone marrow
hsa-miR-491-5p	MIMAT0002807	XIST	7503	CLIP-Seq	24297251	Bone marrow
hsa-miR-491-5p	MIMAT0002807	XIST	7503	CLIP-Seq	24297251	Bone marrow
hsa-miR-491-5p	MIMAT0002807	XIST	7503	CLIP-Seq	24297251	Bone marrow
hsa-miR-494-3p	MIMAT0002816	XIST	7503	CLIP-Seq	24297251	Bone marrow
hsa-miR-494-3p	MIMAT0002816	XIST	7503	CLIP-Seq	24297251	Bone marrow
hsa-miR-495-3p	MIMAT0002817	XIST	7503	CLIP-Seq	24297251	Bone marrow
hsa-miR-497-5p	MIMAT0002820	XIST	7503	CLIP-Seq	24297251	Bone marrow
hsa-miR-497-5p	MIMAT0002820	XIST	7503	CLIP-Seq	24297251	Bone marrow
hsa-miR-497-5p	MIMAT0002820	XIST	7503	CLIP-Seq	24297251	Bone marrow
hsa-miR-497-5p	MIMAT0002820	XIST	7503	CLIP-Seq	24297251	Bone marrow
hsa-miR-497-5p	MIMAT0002820	XIST	7503	CLIP-Seq	24297251	Bone marrow
hsa-miR-498	MIMAT0002824	XIST	7503	CLIP-Seq	24297251	Bone marrow
hsa-miR-498	MIMAT0002824	XIST	7503	CLIP-Seq	24297251	Bone marrow
hsa-miR-500a-3p	MIMAT0002871	XIST	7503	CLIP-Seq	24297251	Bone marrow
hsa-miR-500a-3p	MIMAT0002871	XIST	7503	CLIP-Seq	24297251	Bone marrow
hsa-miR-500a-3p	MIMAT0002871	XIST	7503	CLIP-Seq	24297251	Bone marrow
hsa-miR-500a-3p	MIMAT0002871	XIST	7503	CLIP-Seq	24297251	Bone marrow
hsa-miR-500a-3p	MIMAT0002871	XIST	7503	CLIP-Seq	24297251	Bone marrow
hsa-miR-500a-3p	MIMAT0002871	XIST	7503	CLIP-Seq	24297251	Bone marrow
hsa-miR-500a-3p	MIMAT0002871	XIST	7503	CLIP-Seq	24297251	Bone marrow
hsa-miR-500a-3p	MIMAT0002871	XIST	7503	CLIP-Seq	24297251	Bone marrow
hsa-miR-500a-3p	MIMAT0002871	XIST	7503	CLIP-Seq	24297251	Bone marrow
hsa-miR-500a-3p	MIMAT0002871	XIST	7503	CLIP-Seq	24297251	Bone marrow
hsa-miR-500b-5p	MIMAT0016925	XIST	7503	CLIP-Seq	24297251	Bone marrow
hsa-miR-500b-5p	MIMAT0016925	XIST	7503	CLIP-Seq	24297251	Bone marrow
hsa-miR-500b-5p	MIMAT0016925	XIST	7503	CLIP-Seq	24297251	Bone marrow
hsa-miR-501-3p	MIMAT0004774	XIST	7503	CLIP-Seq	24297251	Bone marrow
hsa-miR-502-3p	MIMAT0004775	XIST	7503	CLIP-Seq	24297251	Bone marrow
hsa-miR-505-3p	MIMAT0002876	XIST	7503	CLIP-Seq	24297251	Bone marrow
hsa-miR-505-3p	MIMAT0002876	XIST	7503	CLIP-Seq	24297251	Bone marrow
hsa-miR-505-3p	MIMAT0002876	XIST	7503	CLIP-Seq	24297251	Bone marrow
hsa-miR-506-3p	MIMAT0002878	XIST	7503	CLIP-Seq	24297251	Bone marrow
hsa-miR-506-3p	MIMAT0002878	XIST	7503	CLIP-Seq	24297251	Bone marrow
hsa-miR-510-5p	MIMAT0002882	XIST	7503	CLIP-Seq	24297251	Bone marrow
hsa-miR-512-3p	MIMAT0002823	XIST	7503	CLIP-Seq	24297251	Bone marrow
hsa-miR-512-3p	MIMAT0002823	XIST	7503	CLIP-Seq	24297251	Bone marrow
hsa-miR-513b-5p	MIMAT0005788	XIST	7503	CLIP-Seq	24297251	Bone marrow
hsa-miR-513b-5p	MIMAT0005788	XIST	7503	CLIP-Seq	24297251	Bone marrow
hsa-miR-513c-5p	MIMAT0005789	XIST	7503	CLIP-Seq	24297251	Bone marrow
hsa-miR-513c-5p	MIMAT0005789	XIST	7503	CLIP-Seq	24297251	Bone marrow
hsa-miR-516b-5p	MIMAT0002859	XIST	7503	CLIP-Seq	24297251	Bone marrow
hsa-miR-518a-3p	MIMAT0002863	XIST	7503	CLIP-Seq	24297251	Bone marrow
hsa-miR-518d-5p	MIMAT0005456	XIST	7503	CLIP-Seq	24297251	Bone marrow
hsa-miR-518f-5p	MIMAT0002841	XIST	7503	CLIP-Seq	24297251	Bone marrow
hsa-miR-519d-3p	MIMAT0002853	XIST	7503	CLIP-Seq	24297251	Bone marrow
hsa-miR-519d-3p	MIMAT0002853	XIST	7503	CLIP-Seq	24297251	Bone marrow
hsa-miR-519d-3p	MIMAT0002853	XIST	7503	CLIP-Seq	24297251	Bone marrow
hsa-miR-519d-3p	MIMAT0002853	XIST	7503	CLIP-Seq	24297251	Bone marrow
hsa-miR-520c-5p	MIMAT0005455	XIST	7503	CLIP-Seq	24297251	Bone marrow
hsa-miR-520d-5p	MIMAT0002855	XIST	7503	CLIP-Seq	24297251	Bone marrow
hsa-miR-520d-5p	MIMAT0002855	XIST	7503	CLIP-Seq	24297251	Bone marrow
hsa-miR-520d-5p	MIMAT0002855	XIST	7503	CLIP-Seq	24297251	Bone marrow
hsa-miR-520d-5p	MIMAT0002855	XIST	7503	CLIP-Seq	24297251	Bone marrow
hsa-miR-520d-5p	MIMAT0002855	XIST	7503	CLIP-Seq	24297251	Bone marrow
hsa-miR-520d-5p	MIMAT0002855	XIST	7503	CLIP-Seq	24297251	Bone marrow
hsa-miR-520h	MIMAT0002867	XIST	7503	CLIP-Seq	24297251	Bone marrow
hsa-miR-520h	MIMAT0002867	XIST	7503	CLIP-Seq	24297251	Bone marrow
hsa-miR-520h	MIMAT0002867	XIST	7503	CLIP-Seq	24297251	Bone marrow
hsa-miR-526a	MIMAT0002845	XIST	7503	CLIP-Seq	24297251	Bone marrow
hsa-miR-526b-5p	MIMAT0002835	XIST	7503	CLIP-Seq	24297251	Bone marrow
hsa-miR-526b-5p	MIMAT0002835	XIST	7503	CLIP-Seq	24297251	Bone marrow
hsa-miR-526b-5p	MIMAT0002835	XIST	7503	CLIP-Seq	24297251	Bone marrow
hsa-miR-526b-5p	MIMAT0002835	XIST	7503	CLIP-Seq	24297251	Bone marrow
hsa-miR-526b-5p	MIMAT0002835	XIST	7503	CLIP-Seq	24297251	Bone marrow
hsa-miR-526b-5p	MIMAT0002835	XIST	7503	CLIP-Seq	24297251	Bone marrow
hsa-miR-532-5p	MIMAT0002888	XIST	7503	CLIP-Seq	24297251	Bone marrow
hsa-miR-541-3p	MIMAT0004920	XIST	7503	CLIP-Seq	24297251	Bone marrow
hsa-miR-541-3p	MIMAT0004920	XIST	7503	CLIP-Seq	24297251	Bone marrow
hsa-miR-542-3p	MIMAT0003389	XIST	7503	CLIP-Seq	24297251	Bone marrow
hsa-miR-542-3p	MIMAT0003389	XIST	7503	CLIP-Seq	24297251	Bone marrow
hsa-miR-543	MIMAT0004954	XIST	7503	CLIP-Seq	24297251	Bone marrow
hsa-miR-545-3p	MIMAT0003165	XIST	7503	CLIP-Seq	24297251	Bone marrow
hsa-miR-545-3p	MIMAT0003165	XIST	7503	CLIP-Seq	24297251	Bone marrow
hsa-miR-545-3p	MIMAT0003165	XIST	7503	CLIP-Seq	24297251	Bone marrow
hsa-miR-545-3p	MIMAT0003165	XIST	7503	CLIP-Seq	24297251	Bone marrow
hsa-miR-545-3p	MIMAT0003165	XIST	7503	CLIP-Seq	24297251	Bone marrow
hsa-miR-545-3p	MIMAT0003165	XIST	7503	CLIP-Seq	24297251	Bone marrow
hsa-miR-545-3p	MIMAT0003165	XIST	7503	CLIP-Seq	24297251	Bone marrow
hsa-miR-552-3p	MIMAT0003215	XIST	7503	CLIP-Seq	24297251	Bone marrow
hsa-miR-552-3p	MIMAT0003215	XIST	7503	CLIP-Seq	24297251	Bone marrow
hsa-miR-574-5p	MIMAT0004795	XIST	7503	CLIP-Seq	24297251	Bone marrow
hsa-miR-574-5p	MIMAT0004795	XIST	7503	CLIP-Seq	24297251	Bone marrow
hsa-miR-577	MIMAT0003242	XIST	7503	CLIP-Seq	24297251	Bone marrow
hsa-miR-577	MIMAT0003242	XIST	7503	CLIP-Seq	24297251	Bone marrow
hsa-miR-577	MIMAT0003242	XIST	7503	CLIP-Seq	24297251	Bone marrow
hsa-miR-577	MIMAT0003242	XIST	7503	CLIP-Seq	24297251	Bone marrow
hsa-miR-577	MIMAT0003242	XIST	7503	CLIP-Seq	24297251	Bone marrow
hsa-miR-582-5p	MIMAT0003247	XIST	7503	CLIP-Seq	24297251	Bone marrow
hsa-miR-582-5p	MIMAT0003247	XIST	7503	CLIP-Seq	24297251	Bone marrow
hsa-miR-590-5p	MIMAT0003258	XIST	7503	CLIP-Seq	24297251	Bone marrow
hsa-miR-615-3p	MIMAT0003283	XIST	7503	CLIP-Seq	24297251	Bone marrow
hsa-miR-624-3p	MIMAT0004807	XIST	7503	CLIP-Seq	24297251	Bone marrow
hsa-miR-624-3p	MIMAT0004807	XIST	7503	CLIP-Seq	24297251	Bone marrow
hsa-miR-625-3p	MIMAT0004808	XIST	7503	CLIP-Seq	24297251	Bone marrow
hsa-miR-625-3p	MIMAT0004808	XIST	7503	CLIP-Seq	24297251	Bone marrow
hsa-miR-625-3p	MIMAT0004808	XIST	7503	CLIP-Seq	24297251	Bone marrow
hsa-miR-625-5p	MIMAT0003294	XIST	7503	CLIP-Seq	24297251	Bone marrow
hsa-miR-629-5p	MIMAT0004810	XIST	7503	CLIP-Seq	24297251	Bone marrow
hsa-miR-651-5p	MIMAT0003321	XIST	7503	CLIP-Seq	24297251	Bone marrow
hsa-miR-651-5p	MIMAT0003321	XIST	7503	CLIP-Seq	24297251	Bone marrow
hsa-miR-651-5p	MIMAT0003321	XIST	7503	CLIP-Seq	24297251	Bone marrow
hsa-miR-653-5p	MIMAT0003328	XIST	7503	CLIP-Seq	24297251	Bone marrow
hsa-miR-653-5p	MIMAT0003328	XIST	7503	CLIP-Seq	24297251	Bone marrow
hsa-miR-654-3p	MIMAT0004814	XIST	7503	CLIP-Seq	24297251	Bone marrow
hsa-miR-654-3p	MIMAT0004814	XIST	7503	CLIP-Seq	24297251	Bone marrow
hsa-miR-654-5p	MIMAT0003330	XIST	7503	CLIP-Seq	24297251	Bone marrow
hsa-miR-654-5p	MIMAT0003330	XIST	7503	CLIP-Seq	24297251	Bone marrow
hsa-miR-655-3p	MIMAT0003331	XIST	7503	CLIP-Seq	24297251	Bone marrow
hsa-miR-655-3p	MIMAT0003331	XIST	7503	CLIP-Seq	24297251	Bone marrow
hsa-miR-655-3p	MIMAT0003331	XIST	7503	CLIP-Seq	24297251	Bone marrow
hsa-miR-655-3p	MIMAT0003331	XIST	7503	CLIP-Seq	24297251	Bone marrow
hsa-miR-663a	MIMAT0003326	XIST	7503	CLIP-Seq	24297251	Bone marrow
hsa-miR-665	MIMAT0004952	XIST	7503	CLIP-Seq	24297251	Bone marrow
hsa-miR-665	MIMAT0004952	XIST	7503	CLIP-Seq	24297251	Bone marrow
hsa-miR-671-5p	MIMAT0003880	XIST	7503	CLIP-Seq	24297251	Bone marrow
hsa-miR-7-5p	MIMAT0000252	XIST	7503	CLIP-Seq	24297251	Bone marrow
hsa-miR-7-5p	MIMAT0000252	XIST	7503	CLIP-Seq	24297251	Bone marrow
hsa-miR-7-5p	MIMAT0000252	XIST	7503	CLIP-Seq	24297251	Bone marrow
hsa-miR-708-5p	MIMAT0004926	XIST	7503	CLIP-Seq	24297251	Bone marrow
hsa-miR-758-3p	MIMAT0003879	XIST	7503	CLIP-Seq	24297251	Bone marrow
hsa-miR-758-3p	MIMAT0003879	XIST	7503	CLIP-Seq	24297251	Bone marrow
hsa-miR-761	MIMAT0010364	XIST	7503	CLIP-Seq	24297251	Bone marrow
hsa-miR-761	MIMAT0010364	XIST	7503	CLIP-Seq	24297251	Bone marrow
hsa-miR-761	MIMAT0010364	XIST	7503	CLIP-Seq	24297251	Bone marrow
hsa-miR-802	MIMAT0004185	XIST	7503	CLIP-Seq	24297251	Bone marrow
hsa-miR-873-5p	MIMAT0004953	XIST	7503	CLIP-Seq	24297251	Bone marrow
hsa-miR-873-5p	MIMAT0004953	XIST	7503	CLIP-Seq	24297251	Bone marrow
hsa-miR-873-5p	MIMAT0004953	XIST	7503	CLIP-Seq	24297251	Bone marrow
hsa-miR-873-5p	MIMAT0004953	XIST	7503	CLIP-Seq	24297251	Bone marrow
hsa-miR-877-5p	MIMAT0004949	XIST	7503	CLIP-Seq	24297251	Bone marrow
hsa-miR-877-5p	MIMAT0004949	XIST	7503	CLIP-Seq	24297251	Bone marrow
hsa-miR-889-3p	MIMAT0004921	XIST	7503	CLIP-Seq	24297251	Bone marrow
hsa-miR-889-3p	MIMAT0004921	XIST	7503	CLIP-Seq	24297251	Bone marrow
hsa-miR-9-3p	MIMAT0000442	XIST	7503	CLIP-Seq	24297251	Bone marrow
hsa-miR-9-5p	MIMAT0000441	XIST	7503	CLIP-Seq	24297251	Bone marrow
hsa-miR-9-5p	MIMAT0000441	XIST	7503	CLIP-Seq	24297251	Bone marrow
hsa-miR-9-5p	MIMAT0000441	XIST	7503	CLIP-Seq	24297251	Bone marrow
hsa-miR-92a-3p	MIMAT0000092	XIST	7503	CLIP-Seq	24297251	Bone marrow
hsa-miR-92a-3p	MIMAT0000092	XIST	7503	CLIP-Seq	24297251	Bone marrow
hsa-miR-92b-3p	MIMAT0003218	XIST	7503	CLIP-Seq	24297251	Bone marrow
hsa-miR-92b-3p	MIMAT0003218	XIST	7503	CLIP-Seq	24297251	Bone marrow
hsa-miR-93-5p	MIMAT0000093	XIST	7503	CLIP-Seq	24297251	Bone marrow
hsa-miR-93-5p	MIMAT0000093	XIST	7503	CLIP-Seq	24297251	Bone marrow
hsa-miR-93-5p	MIMAT0000093	XIST	7503	CLIP-Seq	24297251	Bone marrow
hsa-miR-93-5p	MIMAT0000093	XIST	7503	CLIP-Seq	24297251	Bone marrow
hsa-miR-941	MIMAT0004984	XIST	7503	CLIP-Seq	24297251	Bone marrow
hsa-miR-96-5p	MIMAT0000095	XIST	7503	CLIP-Seq	24297251	Bone marrow
hsa-miR-96-5p	MIMAT0000095	XIST	7503	CLIP-Seq	24297251	Bone marrow
hsa-miR-96-5p	MIMAT0000095	XIST	7503	CLIP-Seq	24297251	Bone marrow
hsa-miR-96-5p	MIMAT0000095	XIST	7503	CLIP-Seq	24297251	Bone marrow
hsa-miR-98-5p	MIMAT0000096	XIST	7503	CLIP-Seq	24297251	Bone marrow
hsa-miR-98-5p	MIMAT0000096	XIST	7503	CLIP-Seq	24297251	Bone marrow
hsa-miR-98-5p	MIMAT0000096	XIST	7503	CLIP-Seq	24297251	Bone marrow
hsa-miR-98-5p	MIMAT0000096	XIST	7503	CLIP-Seq	24297251	Bone marrow

## Sheet: NFKB1 miRNAs
hsa-miR-9-5p
hsa-miR-146a-5p
hsa-miR-146b-5p
hsa-miR-15a-5p
hsa-let-7a-5p
hsa-miR-16-5p
hsa-miR-21-5p
hsa-miR-155-5p
hsa-miR-26b-5p
hsa-miR-92a-3p
hsa-miR-508-3p
hsa-miR-199a-5p
hsa-miR-139-5p

## Sheet: BCL2 miRNAs
hsa-miR-34b-5p
hsa-miR-21-5p
hsa-miR-204-5p
hsa-miR-153-3p
hsa-miR-1-3p
hsa-let-7d-5p
hsa-let-7c-5p
hsa-let-7a-5p
hsa-miR-15a-5p
hsa-miR-15b-5p
hsa-miR-16-5p
hsa-miR-34a-5p
hsa-miR-20a-5p
hsa-miR-17-5p
hsa-miR-29c-3p
hsa-miR-29b-3p
hsa-miR-29a-3p
hsa-miR-34b-3p
hsa-miR-181d-5p
hsa-miR-181c-5p
hsa-miR-181b-5p
hsa-miR-181a-5p
hsa-miR-34c-5p
hsa-miR-33b-5p
hsa-miR-192-5p
hsa-miR-195-5p
hsa-miR-630
hsa-miR-451a
hsa-miR-365a-3p
hsa-miR-125b-5p
hsa-miR-449a
hsa-miR-200b-3p
hsa-miR-200c-3p
hsa-miR-429
hsa-miR-136-5p
hsa-miR-7-5p
hsa-miR-148a-3p
hsa-miR-24-2-5p
hsa-miR-182-5p
hsa-miR-196b-5p
hsa-miR-143-3p
hsa-miR-375
hsa-miR-215-5p
hsa-miR-103a-3p
hsa-miR-96-5p
hsa-miR-296-5p
hsa-miR-205-5p
hsa-miR-126-3p
hsa-miR-18a-5p
hsa-miR-497-5p
hsa-miR-1915-3p
hsa-miR-206
hsa-miR-34a-3p
hsa-miR-448
hsa-miR-125a-5p
hsa-miR-708-5p
hsa-miR-184
hsa-miR-30b-5p
hsa-miR-135a-5p
hsa-miR-224-5p
hsa-miR-503-5p
hsa-miR-494-3p
hsa-miR-211-5p
hsa-miR-9-5p
hsa-miR-139-5p

## Sheet: BCL2 TFs
No. of datasets	TF	Tissue	No. of peaks (total/average)	No. of peaks in gene body (total/average)	No. of peaks around TSS (total/average)	The peak close to TSS	The peak with strongest signal
1	BRD4	blood,bone,marrow	2025-07-07	2025-06-06	2025-01-01	chr18,63319649,63320973,9.48,-845,pr,dataset-280	chr18,63155381,63155796,10.3,1643,gb,dataset-280
1	EP300	blood,bone,marrow	2025-05-05	2025-04-04	2025-01-01	chr18,63319961,63320446,5.92,-318,pr,dataset-939	chr18,63155437,63155813,12.8,1643,gb,dataset-939
1	ETS1	blood,bone,marrow	21/ 21	19 / 19	2025-02-02	chr18,63319595,63319968,5.01,160,pr,dataset-1158	chr18,63138008,63138662,14.7,1814,gb,dataset-1158
1	MED1	blood,bone,marrow	2025-07-07	2025-06-06	2025-01-01	chr18,63319489,63320663,5.26,-535,pr,dataset-2011	chr18,63290976,63291183,7.58,2894,gb,dataset-2011
1	NOTCH1	blood,bone,marrow	2025-05-05	2025-04-04	2025-01-01	chr18,63319841,63319945,4.69,183,pr,dataset-2285	chr18,63319841,63319945,4.69,183,pr,dataset-2285
1	RBPJ	blood,bone,marrow	2025-03-03	2025-02-02	2025-01-01	chr18,63320141,63320279,6.71,-151,pr,dataset-2675	chr18,63320141,63320279,6.71,-151,pr,dataset-2675
1	ATF1	bone marrow	2025-01-01	2025-01-01	0 / 0	chr18,63161880,63162050,10.3,1580,gb,dataset-177	chr18,63161880,63162050,10.3,1580,gb,dataset-177
1	ATF3	bone marrow	2025-02-02	2025-02-02	0 / 0	chr18,63161875,63161987,5.43,1581,gb,dataset-186	chr18,63155318,63155428,6.70,1647,gb,dataset-186
1	BHLHE40	bone marrow	2025-04-04	2025-04-04	0 / 0	chr18,63208872,63209014,5.73,1111,gb,dataset-233	chr18,63161852,63162135,17.9,1579,gb,dataset-233
1	BRD4	bone marrow	2025-06-06	2025-06-06	0 / 0	chr18,63161004,63161238,4.03,1588,gb,dataset-4375	chr18,63158932,63159540,6.19,1605,gb,dataset-4375
14	CTCF	bone marrow	65/ 4	39 / 2	26 / 1	chr18,63320359,63320493,7.68,-365,pr,dataset-766	chr18,63155210,63155769,164.,1643,gb,dataset-4322
1	CTCFL	bone marrow	2025-01-01	0 / 0	2025-01-01	chr18,63320379,63320530,17.9,-402,pr,dataset-777	chr18,63320379,63320530,17.9,-402,pr,dataset-777
1	E2F4	bone marrow	2025-01-01	0 / 0	2025-01-01	chr18,63320239,63320612,10.5,-484,pr,dataset-810	chr18,63320239,63320612,10.5,-484,pr,dataset-810
3	E2F6	bone marrow	2025-09-03	2025-03-01	2025-06-02	chr18,63319955,63320087,5.21,41,pr,dataset-820	chr18,63320236,63320790,52.7,-662,pr,dataset-820
1	EGR1	bone marrow	2025-06-06	2025-04-04	2025-02-02	chr18,63320129,63320551,15.7,-423,pr,dataset-841	chr18,63313599,63313830,36.2,6298,gb,dataset-841
1	ETS1	bone marrow	2025-01-01	0 / 0	2025-01-01	chr18,63320253,63320590,6.85,-462,pr,dataset-1152	chr18,63320253,63320590,6.85,-462,pr,dataset-1152
3	FOS	bone marrow	2025-05-01	2025-05-01	0 / 0	chr18,63161776,63162082,18.8,1580,gb,dataset-1247	chr18,63161776,63162082,18.8,1580,gb,dataset-1247
1	FOSL1	bone marrow	2025-02-02	2025-02-02	0 / 0	chr18,63161867,63162013,6.41,1581,gb,dataset-1262	chr18,63155291,63155493,15.7,1646,gb,dataset-1262
2	GATA1	bone marrow	2025-12-06	2025-10-05	2025-02-01	chr18,63319469,63320041,5.44,87,pr,dataset-1454	chr18,63192955,63193285,22.6,1268,gb,dataset-4329
1	GFI1B	bone marrow	2025-01-01	2025-01-01	0 / 0	chr18,63161877,63162092,11.1,1580,gb,dataset-1533	chr18,63161877,63162092,11.1,1580,gb,dataset-1533
2	HDAC2	bone marrow	2025-02-01	2025-02-01	0 / 0	chr18,63161927,63162089,5.81,1580,gb,dataset-1594	chr18,63161901,63162082,10.3,1580,gb,dataset-1592
1	IRF4	bone marrow	2025-05-05	2025-05-05	0 / 0	chr18,63198939,63199351,4.73,1207,gb,dataset-1782	chr18,63198283,63198703,6.19,1214,gb,dataset-1782
5	JUN	bone marrow	2025-12-02	2025-12-02	0 / 0	chr18,63193057,63193194,5.57,1269,gb,dataset-1815	chr18,63161859,63162044,26.1,1580,gb,dataset-1802
1	JUNB	bone marrow	2025-01-01	2025-01-01	0 / 0	chr18,63161760,63162067,13.5,1580,gb,dataset-1819	chr18,63161760,63162067,13.5,1580,gb,dataset-1819
2	JUND	bone marrow	2025-08-04	2025-08-04	0 / 0	chr18,63200012,63200175,6.22,1199,gb,dataset-1828	chr18,63161766,63162134,37.3,1579,gb,dataset-1828
1	KDM5B	bone marrow	2025-01-01	0 / 0	2025-01-01	chr18,63320417,63320708,13.9,-580,pr,dataset-1869	chr18,63320417,63320708,13.9,-580,pr,dataset-1869
1	KMT2A	bone marrow	2025-08-08	2025-06-06	2025-02-02	chr18,63319364,63319949,12.8,179,pr,dataset-1906	chr18,63319364,63319949,12.8,179,pr,dataset-1906
3	MAX	bone marrow	23/ 7	19 / 6	2025-04-01	chr18,63319651,63320007,7.54,121,pr,dataset-1961	chr18,63161830,63162134,25.2,1579,gb,dataset-1968
1	MAZ	bone marrow	2025-04-04	2025-02-02	2025-02-02	chr18,63320282,63320470,7.62,-342,pr,dataset-1990	chr18,63320282,63320470,7.62,-342,pr,dataset-1990
1	MEIS1	bone marrow	2025-03-03	2025-03-03	0 / 0	chr18,63311324,63311530,5.48,8598,gb,dataset-2038	chr18,63155282,63155472,10.9,1646,gb,dataset-2038
8	MYC	bone marrow	31/ 3	23 / 2	2025-08-01	chr18,63320395,63320512,5.55,-384,pr,dataset-2132	chr18,63319780,63321028,20.7,-900,pr,dataset-2110
2	PHF8	bone marrow	2025-08-04	2025-03-01	2025-05-02	chr18,63319540,63320099,9.23,29,pr,dataset-2440	chr18,63320146,63320973,34.6,-845,pr,dataset-2446
4	POLR2A	bone marrow	2025-09-02	2000-02-01	2025-07-01	chr18,63319885,63320036,5.02,92,pr,dataset-2519	chr18,63320127,63320895,23.7,-767,pr,dataset-2519
2	RAD21	bone marrow	2025-04-02	2025-02-01	2025-02-01	chr18,63323119,63323273,11.9,-314,pr,dataset-2597	chr18,63323122,63323283,16.9,-315,pr,dataset-2599
1	RBBP5	bone marrow	2025-03-03	2025-01-01	2025-02-02	chr18,63320259,63320533,5.33,-405,pr,dataset-2660	chr18,63320259,63320533,5.33,-405,pr,dataset-2660
1	RUNX1	bone marrow	20/ 20	17 / 17	2025-03-03	chr18,63319596,63319921,5.08,207,pr,dataset-2852	chr18,63144701,63145052,32.5,1750,gb,dataset-2852
1	SMC3	bone marrow	2025-02-02	2025-01-01	2025-01-01	chr18,63323067,63323373,12.1,-324,pr,dataset-3008	chr18,63323067,63323373,12.1,-324,pr,dataset-3008
1	SPI1	bone marrow	2025-06-06	2025-06-06	0 / 0	chr18,63198604,63199284,6.62,1208,gb,dataset-3313	chr18,63162381,63162723,26.8,1574,gb,dataset-3313
1	TAF1	bone marrow	2025-02-02	0 / 0	2025-02-02	chr18,63320409,63320530,6.79,-402,pr,dataset-3473	chr18,63320409,63320530,6.79,-402,pr,dataset-3473
1	TCF3	bone marrow	2025-05-05	2025-05-05	0 / 0	chr18,63199335,63199634,5.25,1204,gb,dataset-3545	chr18,63138184,63138640,7.95,1814,gb,dataset-3545
2	UBTF	bone marrow	2025-08-04	2025-03-01	2025-05-02	chr18,63319868,63320051,13.3,77,pr,dataset-3701	chr18,63320194,63320513,13.7,-385,pr,dataset-3701
1	USF1	bone marrow	2025-01-01	2025-01-01	0 / 0	chr18,63161842,63162079,13.7,1580,gb,dataset-3709	chr18,63161842,63162079,13.7,1580,gb,dataset-3709
1	YY1	bone marrow	2025-07-07	2025-05-05	2025-02-02	chr18,63320240,63320559,6.53,-431,pr,dataset-3760	chr18,63161716,63161974,8.65,1581,gb,dataset-3760
1	ZBTB7A	bone marrow	2025-05-05	2025-02-02	2025-03-03	chr18,63319827,63320016,7.86,112,pr,dataset-3796	chr18,63320243,63320712,23.4,-584,pr,dataset-3796

## Sheet: NFKB1 TFs
No. of datasets	TF	Tissue	No. of peaks (total/average)	No. of peaks in gene body (total/average)	No. of peaks around TSS (total/average)	The peak close to TSS	The peak with strongest signal
1	BRD4	blood,bone,marrow	2025-03-03	2025-02-02	2025-01-01	chr4,102501174,102502473,6.49,-155,pr,dataset-280	chr4,102501174,102502473,6.49,-155,pr,dataset-280
1	EP300	blood,bone,marrow	2025-02-02	2025-02-02	0 / 0	chr4,102502332,102502465,5.94,1003,gb,dataset-939	chr4,102574388,102574593,9.23,7305,gb,dataset-939
1	ETS1	blood,bone,marrow	2025-12-12	2025-10-10	2025-02-02	chr4,102501214,102501487,11.7,-115,pr,dataset-1158	chr4,102598461,102598940,16.4,9713,gb,dataset-1158
1	RUNX1	blood,bone,marrow	2025-07-07	2025-07-07	0 / 0	chr4,102502115,102502217,3.69,786,gb,dataset-2832	chr4,102586704,102587047,15.4,8537,gb,dataset-2832
1	BHLHE40	bone marrow	2025-03-03	2025-02-02	2025-01-01	chr4,102501742,102501991,7.44,413,pr,dataset-233	chr4,102501742,102501991,7.44,413,pr,dataset-233
1	CBX3	bone marrow	2025-06-06	2025-03-03	2025-03-03	chr4,102501329,102501433,2.33,0,pr,dataset-340	chr4,102591561,102591695,5.05,9023,gb,dataset-340
9	CTCF	bone marrow	35/ 3	32 / 3	2000-03-01	chr4,102501461,102501625,7.59,132,pr,dataset-738	chr4,102610133,102610324,25.1,1088,gb,dataset-738
1	CUX1	bone marrow	2025-01-01	2025-01-01	0 / 0	chr4,102503820,102503992,5.14,2491,gb,dataset-783	chr4,102503820,102503992,5.14,2491,gb,dataset-783
1	E2F4	bone marrow	2025-05-05	2025-03-03	2025-02-02	chr4,102501506,102501795,5.97,177,pr,dataset-810	chr4,102502275,102502488,9.35,946,gb,dataset-810
3	E2F6	bone marrow	2025-09-03	2025-04-01	2025-05-01	chr4,102501418,102502093,9.12,89,pr,dataset-822	chr4,102500873,102502138,25.1,-456,pr,dataset-820
1	EGR1	bone marrow	2025-06-06	2025-03-03	2025-03-03	chr4,102501120,102501371,11.6,-209,pr,dataset-841	chr4,102501811,102502036,26.2,482,pr,dataset-841
1	ELF1	bone marrow	2025-05-05	2025-03-03	2025-02-02	chr4,102501239,102501445,6.06,-90,pr,dataset-856	chr4,102501728,102502042,14.3,399,pr,dataset-856
1	EP300	bone marrow	2025-04-04	2025-04-04	0 / 0	chr4,102564344,102564696,15.6,6301,gb,dataset-967	chr4,102610575,102610958,23.3,1092,gb,dataset-967
1	ETS1	bone marrow	2025-03-03	2025-02-02	2025-01-01	chr4,102501379,102501768,6.02,50,pr,dataset-1152	chr4,102501835,102502026,6.78,506,gb,dataset-1152
1	FOS	bone marrow	2025-01-01	2025-01-01	0 / 0	chr4,102535755,102536007,8.99,3442,gb,dataset-4235	chr4,102535755,102536007,8.99,3442,gb,dataset-4235
1	GABPA	bone marrow	2025-03-03	2025-02-02	2025-01-01	chr4,102501272,102501479,4.63,-57,pr,dataset-1417	chr4,102501272,102501479,4.63,-57,pr,dataset-1417
6	GATA1	bone marrow	47/ 7	43 / 7	2000-04-01	chr4,102501677,102501907,3.43,348,pr,dataset-1454	chr4,102612069,102612416,109.,1107,gb,dataset-4329
1	HDAC1	bone marrow	2025-02-02	2025-01-01	2025-01-01	chr4,102501300,102502329,12.0,-29,pr,dataset-1590	chr4,102501300,102502329,12.0,-29,pr,dataset-1590
1	HEY1	bone marrow	2025-03-03	2025-02-02	2025-01-01	chr4,102501245,102502097,10.2,-84,pr,dataset-1621	chr4,102501245,102502097,10.2,-84,pr,dataset-1621
1	IRF2	bone marrow	2025-01-01	2025-01-01	0 / 0	chr4,102502158,102502331,4.94,829,gb,dataset-1770	chr4,102502158,102502331,4.94,829,gb,dataset-1770
1	JUND	bone marrow	2025-06-06	2025-04-04	2025-02-02	chr4,102501264,102501447,6.03,-65,pr,dataset-1828	chr4,102501766,102502015,7.57,437,pr,dataset-1828
1	KDM5B	bone marrow	2025-04-04	2025-02-02	2025-02-02	chr4,102501258,102502158,16.8,-71,pr,dataset-1869	chr4,102501258,102502158,16.8,-71,pr,dataset-1869
1	KMT2A	bone marrow	2025-05-05	2025-02-02	2025-03-03	chr4,102501198,102501535,13.4,-131,pr,dataset-1906	chr4,102501198,102501535,13.4,-131,pr,dataset-1906
1	MAFF	bone marrow	2025-01-01	2025-01-01	0 / 0	chr4,102504420,102504746,22.6,3091,gb,dataset-1946	chr4,102504420,102504746,22.6,3091,gb,dataset-1946
2	MAX	bone marrow	2025-09-04	2025-05-02	2025-04-02	chr4,102501171,102502122,41.5,-158,pr,dataset-1968	chr4,102501171,102502122,41.5,-158,pr,dataset-1968
1	MAZ	bone marrow	2025-03-03	2025-02-02	2025-01-01	chr4,102501204,102502000,12.7,-125,pr,dataset-1990	chr4,102502078,102502510,14.0,749,gb,dataset-1990
1	MEIS1	bone marrow	2025-02-02	2025-02-02	0 / 0	chr4,102564311,102564509,3.29,6298,gb,dataset-2038	chr4,102564798,102565023,7.45,6346,gb,dataset-2038
7	MYC	bone marrow	17/ 2	2025-08-01	2025-09-01	chr4,102501273,102501418,4.69,-56,pr,dataset-2094	chr4,102501229,102502571,31.5,-100,pr,dataset-2100
1	NR2F2	bone marrow	2025-06-06	2025-05-05	2025-01-01	chr4,102501344,102501485,3.73,15,pr,dataset-2307	chr4,102561659,102561819,5.30,6033,gb,dataset-2307
1	NRF1	bone marrow	2025-01-01	2025-01-01	0 / 0	chr4,102502357,102502493,6.01,1028,gb,dataset-2360	chr4,102502357,102502493,6.01,1028,gb,dataset-2360
1	PBX1	bone marrow	2025-07-07	2025-07-07	0 / 0	chr4,102502155,102502436,4.24,826,gb,dataset-2411	chr4,102610516,102610985,70.2,1091,gb,dataset-2411
2	PHF8	bone marrow	2025-06-03	2025-04-02	2025-02-01	chr4,102500765,102502386,62.1,-564,pr,dataset-2446	chr4,102500765,102502390,63.5,-564,pr,dataset-2440
6	POLR2A	bone marrow	20/ 3	2025-11-01	2025-09-01	chr4,102501276,102501496,7.37,-53,pr,dataset-2486	chr4,102500861,102502448,27.2,-468,pr,dataset-2473
1	RAD21	bone marrow	2025-03-03	2025-03-03	0 / 0	chr4,102541837,102541939,7.16,4050,gb,dataset-2599	chr4,102578989,102579153,9.51,7766,gb,dataset-2599
1	RBBP5	bone marrow	2025-02-02	2025-01-01	2025-01-01	chr4,102500927,102502471,15.6,-402,pr,dataset-2660	chr4,102500927,102502471,15.6,-402,pr,dataset-2660
1	REST	bone marrow	2025-07-07	2025-03-03	2025-04-04	chr4,102501213,102501449,7.03,-116,pr,dataset-2759	chr4,102501213,102501449,7.03,-116,pr,dataset-2759
2	RUNX1	bone marrow	2025-10-05	2025-07-03	2025-03-01	chr4,102501222,102501502,12.7,-107,pr,dataset-2852	chr4,102564311,102564729,61.7,6298,gb,dataset-2852
2	SPI1	bone marrow	15/ 7	2025-11-05	2025-04-02	chr4,102501162,102501486,5.30,-167,pr,dataset-3313	chr4,102492628,102492840,47.7,-870,pr,dataset-3082
1	TAF1	bone marrow	2025-02-02	2025-01-01	2025-01-01	chr4,102500859,102502479,17.3,-470,pr,dataset-3473	chr4,102500859,102502479,17.3,-470,pr,dataset-3473
1	TAL1	bone marrow	2025-01-01	2025-01-01	0 / 0	chr4,102592307,102592648,8.09,9097,gb,dataset-3489	chr4,102592307,102592648,8.09,9097,gb,dataset-3489
1	TCF3	bone marrow	2025-04-04	2025-04-04	0 / 0	chr4,102514612,102514791,5.77,1328,gb,dataset-3545	chr4,102564309,102564761,23.8,6298,gb,dataset-3545
1	TCF7L2	bone marrow	2025-01-01	2025-01-01	0 / 0	chr4,102503577,102503805,18.0,2248,gb,dataset-3565	chr4,102503577,102503805,18.0,2248,gb,dataset-3565
1	TEAD4	bone marrow	2025-08-08	2025-05-05	2025-03-03	chr4,102501273,102501443,3.76,-56,pr,dataset-3571	chr4,102501736,102502280,10.3,407,pr,dataset-3571
2	UBTF	bone marrow	2025-06-03	2025-03-01	2025-03-01	chr4,102501320,102502194,14.6,-9,pr,dataset-3701	chr4,102501320,102502194,14.6,-9,pr,dataset-3701
1	USF1	bone marrow	2025-03-03	2025-03-03	0 / 0	chr4,102502359,102502525,7.09,1030,gb,dataset-3709	chr4,102502359,102502525,7.09,1030,gb,dataset-3709
3	YY1	bone marrow	2025-10-03	2025-06-02	2025-04-01	chr4,102501288,102501729,10.7,-41,pr,dataset-3763	chr4,102500980,102502081,15.8,-349,pr,dataset-3760
1	ZBTB7A	bone marrow	2025-03-03	2025-01-01	2025-02-02	chr4,102501420,102502080,10.1,91,pr,dataset-3796	chr4,102500877,102501317,13.0,-452,pr,dataset-3796
1	ZNF143	bone marrow	2025-02-02	2025-01-01	2025-01-01	chr4,102501800,102502010,11.5,471,pr,dataset-3814	chr4,102501800,102502010,11.5,471,pr,dataset-3814

## Sheet: Common TFs
RAD21
YY1
ETS1
EGR1
MEIS1
FOS
KMT2A
TCF3
GATA1
MYC
BRD4
CTCF
USF1
TAF1
MAX
UBTF
RBBP5
POLR2A
KDM5B
E2F6
MAZ
PHF8
BHLHE40
E2F4
ZBTB7A
EP300
RUNX1
JUND
SPI1
